# Supplementary material for: Association between integrase strand transfer inhibitor use with insulin resistance and incident diabetes mellitus in persons living with HIV: a systematic review and meta-analysis
Source: HighWire-hosted journal article supplement (doi:10.1136/bmjdrc-2022-003136), 2023-02-01
Supplement: bmjdrc-2022-003136supp001_data_supplement.pdf [file bmjdrc-2022-003136supp001_data_supplement.pdf]

## Association between integrase strand transfer inhibitor use with insulin resistance and incident diabetes mellitus in persons living with HIV: a systematic review and meta-analysis

Frank Mulindwa<sup>1,2</sup>, Habiba Kamal<sup>3,4</sup>, Barbara Castelnuovo<sup>1</sup>, Dathan M. Byonanebye<sup>5,6</sup>, Jean-Marc Schwarz<sup>7</sup>, Robert Bollinger<sup>8</sup> and Nele Brusselaers<sup>2,9,10</sup>

### Affiliations:

- 1- Makerere University Infectious Diseases Institute, Kampala, Uganda.
- 2- Global Health Institute, Antwerp University, Antwerp, Belgium
- 3- Department of Infectious Diseases, Karolinska University Hospital, Stockholm, Sweden.
- 4- Department of Medicine Huddinge, Karolinska Institute, Stockholm, Sweden.
- 5- Kirby Institute, University of New South Wales, Sydney, Australia
- 6- School of Public health, Makerere University, Kampala, Uganda.
- 7- University of California San Francisco, School of Medicine, San Francisco, USA
- 8- Johns Hopkins University, Baltimore, USA
- 9- Centre for Translational Microbiome Research, Department of Microbiology, Tumour and Cell Biology, Karolinska Institutet, Stockholm, Sweden.
- 10-Department of Head and Skin, Ghent University, Ghent, Belgium

### Supplementary

SD: Link to the study dataset.

EMethods 1: Documentation of search strategies by Karolinska University Library search consultation group

### Tables

- Table S1: Study characteristics of all the studies included in the systematic review and meta-analysis.
- Table S2: Outcome definitions.
- Table S3: Fields of collected data in excel sheet.
- Table S4: Quality assessment of the 12 randomized controlled trials included in the meta-analysis per Revised Cochrane risk-of-bias tool (RoB2)
- Table S5: Quality assessment of the 6 cohort studies included in the meta-analysis per Newcastle-Ottawa scale (NOS)\*
- Table S6: Studies excluded upon full text review and reasons for exclusion.
- Table S7: Meta-regression\* analysis of study and HIV-related variables on the pooled effect estimate

### Figures

- Figure S1: Sub-analysis by non-INSTIs regimen in the control group (protease inhibitors and non-nucleotide reverse transcriptase inhibitors).
- Figure S2: Sub-analysis by follow-up duration
- Figure S3: Sub-analysis geographical origin of the study population.
- Figure S4: Sub-analysis by ART status at baseline.
- Figure S5: Sub-analysis by study design.

- Figure S6: Assessment of publication bias by funnel plot asymmetry test for 13 studies meta-analysed for incident insulin resistance and/or diabetes in INSTIs compared to non-INSTIs.
- Figure S7: Mean changes in HOMA-IR from baseline in INSTIs group compared to overall non-INSTIs, NNRTIs and PIs groups.
- Figure S8: Bubble plots for univariable meta-regression on (A) Baseline viral load (B) Age (C) Baseline CD4 cell count.
- Figure S9: Bubble plot for univariable meta-regression on follow-up time.
- Figure S10: Influence analysis\*by leave one-out-method for 13 studies pooled in the meta-analysis sorted by effect size.
- Figure S11: Baujat plot\*showing each study contribution to the overall heterogeneity of the meta-analysis (studies n=13)
- S12; Link to dataset
- Continuation of manuscript references:

**SD:** [https://osf.io/9eh74/?view\\_only=916713d9739340879e47249c8625b33d](https://osf.io/9eh74/?view_only=916713d9739340879e47249c8625b33d)

**EMethods 1:** Documentation of search strategies by Karolinska University Library search consultation group

Date: 15<sup>th</sup> - June 2022

**Topic/research question:** Association between integrase strand transfer inhibitor use with insulin resistance and incident diabetes mellitus in persons living with HIV: a systematic review and meta-analysis

**Name of researcher(s):** Frank Mulindwa, Habiba Kamal & Nele Brusselaers.

**Librarian(s):** GunBrit Knutssön & Narcisa Hannerz

---

**Databases:**

1. Medline(OVID)
2. Embase.com
3. Web of Science(Clarivate)

---

**Total number of hits:**

- Before deduplication: 15,890
- After deduplication: 9,853

---

A) Medline

| #  | Searches                                                                                                                                              | Results |
|----|-------------------------------------------------------------------------------------------------------------------------------------------------------|---------|
| 1  | exp Anti-Retroviral Agents/                                                                                                                           | 84,542  |
| 2  | Highly Active Antiretroviral Therapy/                                                                                                                 | 11752   |
| 3  | ((agent* or drug* or inhibitor* or therapy) adj1 (anti-aids or anti-hiv or anti-retroviral or antiretroviral or hiv integrase)).ti,ab,kf.             | 59278   |
| 4  | (bictegravir or cabotegravir or dolutegravir or elvitegravir or raltegravir or HAART).ti,ab,kf.                                                       | 15983   |
| 5  | or/1-4                                                                                                                                                | 115,852 |
| 6  | Blood Glucose/                                                                                                                                        | 177,763 |
| 7  | exp Diabetes Mellitus/                                                                                                                                | 481,823 |
| 8  | Glycated Hemoglobin A/                                                                                                                                | 40338   |
| 9  | Homeostasis/                                                                                                                                          | 68,901  |
| 10 | exp Hyperglycemia/                                                                                                                                    | 39650   |
| 11 | Hyperinsulinism/                                                                                                                                      | 8908    |
| 12 | exp Insulins/                                                                                                                                         | 201259  |
| 13 | exp Insulin Resistance/                                                                                                                               | 94596   |
| 14 | (diabetes or insulin-dependent or non-insulin dependent or prediabetic).ti,ab,kf.                                                                     | 618990  |
| 15 | (blood glucose or fasting glucose or glucose intolerance or hemoglobin* or homeosta* or HOMA or hyperglyc?em* or insulin* or hyperinsulin*).ti,ab,kf. | 821226  |
| 16 | ((complicat* or syndrome) adj1 (cardiometabolic or cardiovascular or dysmetabolic or metabolic or reaven)).ti,ab,kf.                                  | 76848   |
| 17 | (DM1 or DM2 or IDDM or Hb A1 or HbA1 or Hb A1c or HbA1c or MODY or NIDDM or T1D or T2D).ti,ab,kf.                                                     | 79840   |

|    |                                                               |         |
|----|---------------------------------------------------------------|---------|
| 18 | or/6-17                                                       | 1428922 |
| 19 | 5 and 18                                                      | 4567    |
| 20 | exp HIV Infections/                                           | 306184  |
| 21 | (acquired immunodeficiency syndrome or AIDS or HIV).ti,ab,kf. | 426783  |
| 22 | or/20-21                                                      | 468198  |
| 23 | 5 and 18 and 22                                               | 4271    |
| 24 | limit 23 to yr="2000 -Current"                                | 4034    |

## B) Embase

|                                                                                                                                                                                                                                                                                                                                                                                                                                                                                                                                                                                                                                                                                                                                                                                                                                                                                                                                                                                                                                                                                                                                                                                                                                                                                                                                                                                                                                                                                                                                                                                                                                                                                                                                                                                                                                          |                                                                                                                                                                                                                                                                                                     |
|------------------------------------------------------------------------------------------------------------------------------------------------------------------------------------------------------------------------------------------------------------------------------------------------------------------------------------------------------------------------------------------------------------------------------------------------------------------------------------------------------------------------------------------------------------------------------------------------------------------------------------------------------------------------------------------------------------------------------------------------------------------------------------------------------------------------------------------------------------------------------------------------------------------------------------------------------------------------------------------------------------------------------------------------------------------------------------------------------------------------------------------------------------------------------------------------------------------------------------------------------------------------------------------------------------------------------------------------------------------------------------------------------------------------------------------------------------------------------------------------------------------------------------------------------------------------------------------------------------------------------------------------------------------------------------------------------------------------------------------------------------------------------------------------------------------------------------------|-----------------------------------------------------------------------------------------------------------------------------------------------------------------------------------------------------------------------------------------------------------------------------------------------------|
| Interface: embase.com                                                                                                                                                                                                                                                                                                                                                                                                                                                                                                                                                                                                                                                                                                                                                                                                                                                                                                                                                                                                                                                                                                                                                                                                                                                                                                                                                                                                                                                                                                                                                                                                                                                                                                                                                                                                                    | Field labels                                                                                                                                                                                                                                                                                        |
| Date of Search: 15th of June 2022                                                                                                                                                                                                                                                                                                                                                                                                                                                                                                                                                                                                                                                                                                                                                                                                                                                                                                                                                                                                                                                                                                                                                                                                                                                                                                                                                                                                                                                                                                                                                                                                                                                                                                                                                                                                        | <ul style="list-style-type: none"> <li>• /exp = exploded Emtree term</li> <li>• /de = non exploded Emtree term</li> <li>• ti,ab,kw = title, abstract and author keywords</li> <li>• NEAR/x = within x words, regardless of order</li> <li>• * = truncation of word for alternate endings</li> </ul> |
| Number of hits: 6,045                                                                                                                                                                                                                                                                                                                                                                                                                                                                                                                                                                                                                                                                                                                                                                                                                                                                                                                                                                                                                                                                                                                                                                                                                                                                                                                                                                                                                                                                                                                                                                                                                                                                                                                                                                                                                    |                                                                                                                                                                                                                                                                                                     |
| Comment: Emtree is the controlled vocabulary in Embase                                                                                                                                                                                                                                                                                                                                                                                                                                                                                                                                                                                                                                                                                                                                                                                                                                                                                                                                                                                                                                                                                                                                                                                                                                                                                                                                                                                                                                                                                                                                                                                                                                                                                                                                                                                   |                                                                                                                                                                                                                                                                                                     |
| <p>#1 'antiretrovirus agent'/exp/mj<br/> #2 'highly active antiretroviral therapy'/mj<br/> #3 ((agent* OR drug* OR inhibitor* OR therapy) NEAR/1 ('anti aids' OR 'anti hiv' OR 'anti retroviral' OR antiretroviral OR 'hiv integrase')).ti,ab,kw<br/> #4 bictegravir:ti,ab,kw OR cabotegravir:ti,ab,kw OR dolutegravir:ti,ab,kw OR elvitegravir:ti,ab,kw OR raltegravir:ti,ab,kw OR haart:ti,ab,kw<br/> #5 #1 OR #2 OR #3 OR #4#6 'glucose blood level'/mj<br/> #7 'diabetes mellitus'/exp/mj<br/> #8 'glycosylated hemoglobin'/exp/mj<br/> #9 'homeostasis'/mj<br/> #10 'hyperglycemia'/mj<br/> #11 'glucose intolerance'/mj<br/> #12 'hyperinsulinism'/mj<br/> #13 'insulin derivative'/exp/mj<br/> #14 'insulin resistance'/mj<br/> #15 'metabolic syndrome x'/mj<br/> #16 diabetes:ti,ab,kw OR 'insulin-dependent':ti,ab,kw OR 'non-insulin dependent':ti,ab,kw OR prediabetic:ti,ab,kw<br/> #17 'blood glucose':ti,ab,kw OR 'fasting glucose':ti,ab,kw OR 'glucose intolerance':ti,ab,kw OR hemoglobin*:ti,ab,kw OR homeosta*:ti,ab,kw OR homa:ti,ab,kw OR hyperglyc\$em*:ti,ab,kw OR insulin*:ti,ab,kw OR hyperinsulin*:ti,ab,kw<br/> #18 ((complicat* OR syndrome) NEAR/1 (cardiometabolic OR cardiovascular OR dysmetabolic OR metabolic OR reaven)):ti,ab,kw<br/> #19 'dm1':ti,ab,kw OR 'dm2':ti,ab,kw OR 'iddm':ti,ab,kw OR 'hb a1':ti,ab,kw OR 'hba1':ti,ab,kw OR 'hb a1c':ti,ab,kw OR 'hba1c':ti,ab,kw OR 'mody':ti,ab,kw OR 'niddm':ti,ab,kw OR 't1d':ti,ab,kw OR 't2d':ti,ab,kw<br/> #20 #6 OR #7 OR #8 OR #9 OR #10 OR #11 OR #12 OR #13 OR #14 OR #15 OR #16 OR #17 OR #18 OR #19<br/> #21 #5 AND #20<br/> <br/> #22 'human immunodeficiency virus infection'/exp/mj<br/> #23 'acquired immunodeficiency syndrome'.ti,ab,kw OR aids:ti,ab,kw OR hiv:ti,ab,kw OR "human immunodeficiency virus \$ infection":ti,ab,kw</p> |                                                                                                                                                                                                                                                                                                     |

#24 #22 OR #23

#25 #21 AND #24 AND [2000-2022]/py

### C) Web of Science Core Collection

|                                                                                                                                                                                                                                                                                                                                                                                                                                                                                                                                                                                                                                                                                                                                                                                                                                           |                                                                                                                                                                                                                                                                                                                                                                                    |
|-------------------------------------------------------------------------------------------------------------------------------------------------------------------------------------------------------------------------------------------------------------------------------------------------------------------------------------------------------------------------------------------------------------------------------------------------------------------------------------------------------------------------------------------------------------------------------------------------------------------------------------------------------------------------------------------------------------------------------------------------------------------------------------------------------------------------------------------|------------------------------------------------------------------------------------------------------------------------------------------------------------------------------------------------------------------------------------------------------------------------------------------------------------------------------------------------------------------------------------|
| <p>Interface: Clarivate Analytics</p> <p>Date of Search: 15<sup>th</sup> of June 2022</p> <p>Number of hits: 5,755</p>                                                                                                                                                                                                                                                                                                                                                                                                                                                                                                                                                                                                                                                                                                                    | <p>Field labels</p> <ul style="list-style-type: none"> <li>• TS/Topic = title, abstract, author keywords and Keywords Plus</li> <li>• NEAR/x = within x words, regardless of order</li> <li>• * = truncation of word for alternate endings</li> </ul> <p>Note: sometimes "quotation marks" are needed for single search terms to avoid automatic term mapping (lemmatization).</p> |
| <p>#1 ((agent* or drug* or inhibitor* or therapy) NEAR/1 ("anti-aids" or "anti-hiv" or anti-retroviral or antiretroviral or "hiv integrase")) OR (bictegravir or cabotegravir or dolutegravir or elvitegravir or raltegravir or HAART)</p> <p>#2 (diabetes or "insulin-dependent" or "non-insulin dependent" or prediabetic) OR ("blood glucose" or "fasting glucose" or "glucose intolerance" or hemoglobin* or homeosta* or HOMA or hyperglycsem* or insulin* or hyperinsulin*) OR ((complicat* or syndrome) NEAR/1 (cardiometabolic or cardiovascular or dysmetabolic or metabolic or reaven)) OR (DM1 or DM2 or IDDM or "Hb A1" or HbA1 or "Hb A1c" or HbA1c or MODY or NIDDM or T1D or T2D)</p> <p>#3 ("acquired immunodeficiency syndrome" or AIDS or HIV)</p> <p>#4 #1 AND #2 AND #3 Refined by: PUBLICATION YEARS: 2000- 2022</p> |                                                                                                                                                                                                                                                                                                                                                                                    |

**Table S1: Study characteristics of all the studies included in the systematic review and meta-analysis.**

| Study name              | First author, Journal, year of publication                    | Study design, setting         | Area of origin of study participants, (ART status at enrollment)                                  | Outcome measure                                         | Number on INSTIs* | Number on non-INSTIs regimen* | Duration of follow-up | Definition of diabetes mellitus                             | Definition of Insulin resistance | Reported potential conflict of interest |
|-------------------------|---------------------------------------------------------------|-------------------------------|---------------------------------------------------------------------------------------------------|---------------------------------------------------------|-------------------|-------------------------------|-----------------------|-------------------------------------------------------------|----------------------------------|-----------------------------------------|
|                         | Eron et al <sup>54</sup> , The Lancet, 2010                   | RCT, multicenter              | Africa, Asia, Europe, USA, Canada, Australia (ART experienced)                                    | ≥ grade 2 fasting hyperglycaemia* (Not meta-analyzable) | 350               | 352                           | 24 weeks              | ≥ grade 2 fasting hyperglycaemia*                           | N/A                              | yes                                     |
|                         | Saumoy et al <sup>38</sup> , Atherosclerosis, 2012            | RCT, multicenter              | Spain (ART experienced)                                                                           | Mean changes in HOMA-IR (Not meta-analyzable)           | 38                | 37                            | 48 weeks              | N/A                                                         | HOMA-IR                          | yes                                     |
| <b>STARTMRK Trial</b>   | Rockstroh et al <sup>40</sup> , JAIDS, 2013                   | RCT, 67 sites in 5 continents | Europe/Australia, North America, Latin America, South East Asia (ART naïve)                       | RR                                                      | 281               | 282                           | 240 weeks             | ≥ grade 2 fasting hyperglycaemia*                           | N/A                              | yes                                     |
|                         | Gupta et al <sup>39</sup> , J Acquir Immune Defic Syndr, 2013 | RCT, single center            | USA (ART experienced)                                                                             | Mean changes in HOMA-IR                                 | 15                | 15                            | 48 weeks              | N/A                                                         | HOMA-IR                          | yes                                     |
| <b>ACTG Study A5257</b> | Lennox et al <sup>43</sup> , Ann Intern Med., 2014            | RCT, multicenter              | USA, Puerto Rico (ART naïve)                                                                      | RR                                                      | 603               | 1208                          | 96 weeks              | ≥ grade 2 fasting hyperglycaemia*                           | N/A                              | None for the current study              |
| <b>FLAMINGO</b>         | Clotet et al <sup>41</sup> , Lancet, 2014                     | RCT, 64 research centers      | France, Germany, Italy, Puerto Rico, Romania, Russia, Spain, Switzerland, and the USA (ART naïve) | RR                                                      | 242               | 242                           | 96 weeks              | ≥ grade 2 fasting hyperglycaemia*                           | N/A                              | yes                                     |
| <b>SINGLE trial</b>     | Walmsley et al <sup>42</sup> , NEJM, 2015                     | RCT, multicenter              | North America, Europe, Australia (ART naïve)                                                      | RR                                                      | 414               | 419                           | 48 weeks              | ≥ grade 2 fasting hyperglycaemia*                           | N/A                              | yes                                     |
|                         | Fargo et al <sup>44</sup> , Open Forum Infect Dis, 2016       | RCT, multicenter              | USA (ART naïve)                                                                                   | Mean changes in HOMA-IR                                 | 106               | 222                           | 96 weeks              | N/A                                                         | HOMA-IR                          | yes                                     |
|                         | Spagnuolo et al <sup>46</sup> , BMC Infectious Diseases, 2017 | Cohort, single center         | Italy (Mixed population)                                                                          | RR                                                      | 772               | 5423                          | 462 weeks             | Two consecutive FPG ≥126 mg/dl OR a 2-h OGTT plasma glucose | N/A                              | None for the current study              |

|                         |                                                                             |                                            |                                                                                 |                         |       |                     |          |                                                                                                                                            |         |                            |
|-------------------------|-----------------------------------------------------------------------------|--------------------------------------------|---------------------------------------------------------------------------------|-------------------------|-------|---------------------|----------|--------------------------------------------------------------------------------------------------------------------------------------------|---------|----------------------------|
|                         |                                                                             |                                            |                                                                                 |                         |       |                     |          | level $\geq$ 200 mg/dL<br>OR two consecutive fasting HBA1C levels of $\geq$ 48 mmol/mol, or a prescription for any antidiabetic medication |         |                            |
| <b>ANRS 12313 trial</b> | Delaporte et al <sup>48</sup> , (NAMSAL study group), NEJM, 2019            | RCT, multicenter                           | Cameroon (ART naïve)                                                            | RR                      | 310   | 303                 | 48 weeks | $\geq$ grade 2 fasting hyperglycaemia*                                                                                                     | N/A     | None for the current study |
|                         | Gianotti et al <sup>45</sup> , J Med Vir., 2019                             | Cohort, single center                      | Italy (ART naïve)                                                               | Mean changes in HOMA-IR | 218   | 190 NNRTI, 210 PI/R | 48 weeks | N/A                                                                                                                                        | HOMA-IR | yes                        |
|                         | Ursenbach et al <sup>28</sup> , Journal of Antimicrobial Chemotherapy, 2020 | Cohort, multicenter in France and overseas | France (ART naïve)                                                              | RR                      | 3403  | 16059               | Variable | Documentation of diabetes in medical record, HbA1c > 7.5%, being on DM treatment                                                           | N/A     | None for the current study |
|                         | Rebeiro et al <sup>30</sup> , Clinical Infectious Diseases, 2020            | Cohort, multicenter in North America       | USA, Canada (ART naïve)                                                         | RR                      | 5183  | 17701               | Variable | HbA1c $\geq$ 6.5%, initiation of diabetes-specific medication, or new DM diagnosis                                                         | N/A     | yes                        |
| <b>ADVANCE trial</b>    | Venter et al <sup>50</sup> , Lancet HIV, 2020                               | RCT, 11 public health clinics              | South Africa (ART naïve)                                                        | RR                      | 690   | 347                 | 96 weeks | Not stated                                                                                                                                 | N/A     | yes                        |
| <b>INSPIRING study</b>  | Dooley et al <sup>47</sup> , Clinical Infectious Diseases, 2020             | RCT, multicenter                           | Argentina, Brazil, Mexico, Peru, Russia, South Africa, and Thailand (ART naïve) | RR                      | 69    | 44                  | 52 weeks | $\geq$ grade 2 fasting hyperglycaemia*                                                                                                     | N/A     | yes                        |
|                         | Hsu et al <sup>49</sup> , AIDS, 2021                                        | Cohort, 84 multicenter                     | USA (ART naïve and experienced)                                                 | RR                      | 15122 | 2076                | Variable | Recorded diagnosis of T2DM, anti-diabetic medication prescription, lab tests indicative of DM.                                             | N/A     | yes                        |
| <b>TANGO study</b>      | Wyk et al <sup>52</sup> , JAIDS, 2021                                       | RCT, 134 multicenter in 10 countries       | USA, Australia, Europe (ART experienced)                                        | RR                      | 303   | 290                 | 48 weeks | NA                                                                                                                                         | N/A     | yes                        |

|  |                                                                       |                                |                         |                                                         |     |      |           |                                                               |         |                                  |
|--|-----------------------------------------------------------------------|--------------------------------|-------------------------|---------------------------------------------------------|-----|------|-----------|---------------------------------------------------------------|---------|----------------------------------|
|  | Ibrahim et al <sup>51</sup> ,<br>HIV med.,<br>2021                    | RCT,<br>9 HIV clinics<br>in UK | UK (ART<br>experienced) | Mean changes in<br>HOMA-IR<br>(Not meta-<br>analysable) | 34  | 19   | 48 weeks  | N/A                                                           | HOMA-IR | yes                              |
|  | Asundi et al <sup>53</sup> ,<br>AIDS Res Hum<br>Retroviruses,<br>2022 | Cohort,<br>Single center       | USA (ART naïve)         | Adjusted RR                                             | 136 | 1099 | 18 months | a new<br>prescription for<br>antihyperglycemi<br>c medication | N/A     | None for<br>the current<br>study |

**Abbreviations: RCT=**randomized controlled trial. **ART=**antiretroviral therapy. **INSTIS=**integrase strand transfer inhibitors. **HOMA-IR: Homeostatic model of Insulin Resistance. RR=** relative risk. **N/A=** not available. **DM=**diabetes mellitus. \*The numbers represent patients without diabetes mellitus at baseline enrolled in the metabolic analyses in each study. **NB Eron et al<sup>(54)</sup> not included in the metanalyses**



**Table S2. Outcome definitions**

| Study outcome             | Acceptable outcome measures in individual studies included in the meta-analysis                                                                                                                                                                                                                                                                                                                                                                                                                                                                                                                                                                                                                                                                                                                                                                                                                                                                                                                                                                                                                                                                                                                                                                                                                                                                                                                                                                                                                                                                                                                                                                                                                                                                                                                                                                                                                                                                                                                                                                                |
|---------------------------|----------------------------------------------------------------------------------------------------------------------------------------------------------------------------------------------------------------------------------------------------------------------------------------------------------------------------------------------------------------------------------------------------------------------------------------------------------------------------------------------------------------------------------------------------------------------------------------------------------------------------------------------------------------------------------------------------------------------------------------------------------------------------------------------------------------------------------------------------------------------------------------------------------------------------------------------------------------------------------------------------------------------------------------------------------------------------------------------------------------------------------------------------------------------------------------------------------------------------------------------------------------------------------------------------------------------------------------------------------------------------------------------------------------------------------------------------------------------------------------------------------------------------------------------------------------------------------------------------------------------------------------------------------------------------------------------------------------------------------------------------------------------------------------------------------------------------------------------------------------------------------------------------------------------------------------------------------------------------------------------------------------------------------------------------------------|
| <b>Diabetes mellitus</b>  | 1- ADA criteria(1): HbA1C $\geq$ 6.5% or FPG $\geq$ 126 mg/dL (7.0 mmol/L) or 2-h PG $\geq$ 200 mg/dL (11.1 mmol/L) during an OGTT<br>2- WHO criteria(2): <ul style="list-style-type: none"> <li>- fasting plasma glucose values of <math>\geq</math> 7.0 mmol/L (126 mg/dl) OR</li> <li>- 2-h post-load plasma glucose <math>\geq</math> 11.1 mmol/L (200 mg/dl) OR</li> <li>- HbA1c <math>\geq</math> 6.5% (48 mmol/mol) OR</li> <li>- random blood glucose <math>\geq</math> 11.1 mmol/L (200 mg/ dl) in the presence of signs and symptoms Need for diabetes medication</li> </ul>                                                                                                                                                                                                                                                                                                                                                                                                                                                                                                                                                                                                                                                                                                                                                                                                                                                                                                                                                                                                                                                                                                                                                                                                                                                                                                                                                                                                                                                                         |
| <b>Metabolic syndrome</b> | 1-NCEP ATP III criteria(3): The presence of three or more of the following risk determinants: <ul style="list-style-type: none"> <li>- increased waist circumference (&gt;102 cm [&gt;40 in] for men, &gt;88 cm [&gt;35 in] for women);</li> <li>- elevated triglycerides (<math>\geq</math>150 mg/dl);</li> <li>- low HDL cholesterol (&lt;40 mg/dl in men, &lt;50 mg/dl in women);</li> <li>- hypertension (<math>\geq</math>130/<math>\geq</math>85 mmHg); and</li> <li>- 5) impaired fasting glucose (<math>\geq</math>110 mg/dl)</li> </ul> 2-WHO criteria(4): Glucose intolerance, DM2 or insulin-resistance in addition to at least two of the following: <ul style="list-style-type: none"> <li>- BMI &gt; 30 and HWR &gt; 0.9 (M) and &gt; 0.85 (F)</li> <li>- Serum TG <math>\geq</math> 150mg/dl</li> <li>- Serum HDL &lt; 35mg/dl (M), &lt;39mg/dl (F)</li> <li>- Blood pressure <math>\geq</math> 140/90 or on hypertension treatment</li> <li>- Other risk factors: microalbuminuria <math>\geq</math>20mcg/min</li> </ul> 3-IDF(5): DM/ Glucose intolerance and two or more criteria <ul style="list-style-type: none"> <li>- Fasting glucose of 100-125mg/dl Or DM 2</li> <li>- WC <math>\geq</math> 94cm (M), 80cm (F)</li> <li>- TG <math>\geq</math>150mg/dl</li> <li>- HDL &lt;40mg/dl or &lt;50mg/dl</li> <li>- On treatment for SAH/ BP <math>\geq</math>130/85mmHG</li> </ul> 4-European Group for Study of Insulin Resistance definition(6): Elevated plasma insulin (>75 <sup>th</sup> percentile) plus two other factors from among the following: <ul style="list-style-type: none"> <li>- Abdominal obesity: waist circumference (WC) <math>\geq</math>94 cm in men and <math>\geq</math>80 cm in women</li> <li>- Hypertension: <math>\geq</math>140/90 mm of Hg or on antihypertensive treatment</li> <li>- Elevated triglycerides (<math>\geq</math>150 mg/dl) and/or reduced HDL-C (&lt;39 mg/dl for both men and women)</li> <li>- Elevated plasma glucose: impaired fasting glucose (IFG) or IGT, but no diabetes</li> </ul> |
| <b>Insulin resistance</b> | Homeostatic model for Insulin resistance (HOMA-IR)(7)                                                                                                                                                                                                                                                                                                                                                                                                                                                                                                                                                                                                                                                                                                                                                                                                                                                                                                                                                                                                                                                                                                                                                                                                                                                                                                                                                                                                                                                                                                                                                                                                                                                                                                                                                                                                                                                                                                                                                                                                          |

Abbreviations: ADA= American Diabetes Association. HbA1C= Glycated Hemoglobin. PG= Plasma Glucose, OGTT= Oral Glucose Tolerance test. WHO= World Health Organization. NCEP ATP III= National Cholesterol Education Program Adult Treatment Panel III. HDL= High Density Lipoproteins. DM2= Diabetes Mellitus type II. BMI= Body Mass Index. TG= triglycerides. IDF=International Diabetes Federation. WC= Waist Circumference. SAH= Systemic Arterial Hypertension. BP= Blood Pressure. IFG= Impaired Fasting Glucose. IGT= Impaired Glucose Tolerance. HOMA-IR=Homeostatic Model for Insulin Resistance.

**Table S3: Fields of data collection in excel sheet**

| Study title                                                                                                                                      | Study ID                      | Author                                           | Year of publication | Journal                                     | Country                                           | study design                      | geographical region of the cohort | continent                       | Setting (nationwide, register based, hospital based) |
|--------------------------------------------------------------------------------------------------------------------------------------------------|-------------------------------|--------------------------------------------------|---------------------|---------------------------------------------|---------------------------------------------------|-----------------------------------|-----------------------------------|---------------------------------|------------------------------------------------------|
| Baseline                                                                                                                                         |                               |                                                  |                     |                                             |                                                   |                                   |                                   |                                 |                                                      |
| Center (primary/tertiary)                                                                                                                        | Study period                  | Recruitment duration                             | Inclusion criteria  | Exclusion criteria                          | Overall cohort number                             | Duration of follow up             | Number of patients per arm        | Number ART naïve pts per arm    | Previous exposure to ART duration per arm            |
| Baseline                                                                                                                                         |                               |                                                  |                     |                                             |                                                   |                                   |                                   |                                 |                                                      |
| number of patients per arm                                                                                                                       | Number ART naïve pts per arm  | Previous exposure to ART duration per arm        | ethnicity           | at baselinen, % male %                      | Female n, %                                       | composite age (mean/median)       | Age (mean, SD) or median male     | Age (mean, SD) or median female | BMI                                                  |
| Baseline                                                                                                                                         |                               |                                                  |                     |                                             |                                                   |                                   |                                   |                                 |                                                      |
| BMI women                                                                                                                                        | BMI men                       | smoking                                          | waist circumference | Presence of lipodystrophy, n, %             | Presence of diabetes mellitus or treatment for DM | criteria of DM diagnosis          | presence of MS (yes/no)           | criteria of diagnosis of MS     | Fasting blood glucose (mg/dl)                        |
| Baseline                                                                                                                                         |                               |                                                  |                     |                                             |                                                   |                                   |                                   |                                 |                                                      |
| HbA1C                                                                                                                                            | Insulin resistance            | CD4 count (median/mean, SD)                      | HIV viral load      | comorbidities viral hepatitis, n, %         | comorbidities tuberculosis, n, %                  | AIDS                              |                                   |                                 |                                                      |
| Outcome                                                                                                                                          |                               |                                                  |                     |                                             |                                                   |                                   |                                   |                                 |                                                      |
| outcome definition in the study                                                                                                                  | diagnostic methods of outcome | outcome number, % who developed diabetes per arm | Change in IR        | number who developed metabolic syndrome, n% | change in blood sugar level, mean (SD)            | change in Hb A1C level, mean (SD) | crude risk/?outcome               | adsjuted risk /?outcome         | Predictors adjusted for in the study                 |
| Abbreviations: ART=antiretroviral therapy. BMI=body mass index. MS= metabolic syndrome. HbA1C=glycated hemoglobin subtype 1C. IR=incidence rate. |                               |                                                  |                     |                                             |                                                   |                                   |                                   |                                 |                                                      |

Table S4: Quality assessment of the 12 randomized controlled trials included in the meta-analysis

| Study                 | Random sequence generation (selection bias) | Allocation concealment (selection bias) | Selective reporting (reporting bias) | Other sources of bias | Blinding (participants and personnel) - (performance bias) | Blinding (outcome assessment)- (detection bias) | Incomplete outcome data (attrition bias) |
|-----------------------|---------------------------------------------|-----------------------------------------|--------------------------------------|-----------------------|------------------------------------------------------------|-------------------------------------------------|------------------------------------------|
| Saumoy et al, 2012    | ●                                           | ●                                       | ●                                    | ●                     | ●                                                          | ●                                               | ●                                        |
| Rockstroh et al, 2013 | ●                                           | ●                                       | ●                                    | ●                     | ●                                                          | ●                                               | ●                                        |
| Gupta et al, 2013     | ●                                           | ●                                       | ●                                    | ●                     | ●                                                          | ●                                               | ●                                        |
| Clotet et al, 2014    | ●                                           | ●                                       | ●                                    | ●                     | ●                                                          | ●                                               | ●                                        |
| Lennox et al, 2015    | ●                                           | ●                                       | ●                                    | ●                     | ●                                                          | ●                                               | ●                                        |
| Walmsley et al, 2015  | ●                                           | ●                                       | ●                                    | ●                     | ●                                                          | ●                                               | ●                                        |
| Fargo et al, 2016     | ●                                           | ●                                       | ●                                    | ●                     | ●                                                          | ●                                               | ●                                        |
| Delaporte et al, 2019 | ●                                           | ●                                       | ●                                    | ●                     | ●                                                          | ●                                               | ●                                        |
| Dooley et al, 2019    | ●                                           | ●                                       | ●                                    | ●                     | ●                                                          | ●                                               | ●                                        |
| Venter et al, 2020    | ●                                           | ●                                       | ●                                    | ●                     | ●                                                          | ●                                               | ●                                        |
| Wyk et al, 2021       | ●                                           | ●                                       | ●                                    | ●                     | ●                                                          | ●                                               | ●                                        |
| Ibrahim et al, 2021   | ●                                           | ●                                       | ●                                    | ●                     | ●                                                          | ●                                               | ●                                        |

● = low risk, ● = high risk, ● = unclear

\*RoB 2: A revised Cochrane risk-of-bias tool for randomized trials | Cochrane Bias. <https://methods.cochrane.org/bias/resources/rob-2-revised-cochrane-risk-bias-tool-randomized-trials>

**per Revised Cochrane risk-of-bias tool (RoB2) \***

**Table S5: Quality assessment of the 6 cohort studies included in the meta-analysis per Newcastle-Ottawa scale (NOS)\*\***

| Study                 | Selection                                   |                                        |                              |                                                                             | Comparability                                                                          | Outcome                  |                                                    |                                     | Overall score |
|-----------------------|---------------------------------------------|----------------------------------------|------------------------------|-----------------------------------------------------------------------------|----------------------------------------------------------------------------------------|--------------------------|----------------------------------------------------|-------------------------------------|---------------|
|                       | 1) Representativeness of the exposed cohort | 2) Selection of the non-exposed cohort | 3) Ascertainment of exposure | 4) Demonstration that outcome of interest was not present at start of study | 1) Comparability of cohorts based on the design or analysis controlled for confounders | 1) Assessment of outcome | 2) Was follow-up long enough for outcomes to occur | 3) Adequacy of follow-up of cohorts |               |
| Spagnuolo et al, 2017 | *                                           | *                                      | *                            | *                                                                           | *                                                                                      | *                        | *                                                  | *                                   | 8             |
| Gianotti et al, 2017  | *                                           | *                                      | *                            | *                                                                           | *                                                                                      | *                        | *                                                  | *                                   | 8             |
| Ursenbach et al, 2020 | *                                           | *                                      | *                            | *                                                                           | *                                                                                      | *                        | *                                                  | *                                   | 8             |
| Hsu et al, 2020       | *                                           | *                                      | *                            | *                                                                           | **                                                                                     | *                        | *                                                  | *                                   | 9             |
| Rebeiro et al, 2020   | *                                           | *                                      | *                            | *                                                                           | **                                                                                     | *                        | *                                                  | *                                   | 9             |
| Asundi et al, 2022    | *                                           | *                                      | *                            | *                                                                           | *                                                                                      | *                        |                                                    |                                     | 6             |

\*\* Newcastle-Ottawa scale (NOS) Ottawa Hospital Research Institute. [http://www.ohri.ca/programs/clinical\\_epidemiology/oxford.asp](http://www.ohri.ca/programs/clinical_epidemiology/oxford.asp)

Score  $\geq 7$  represents low risk of bias

**Table S6: Studies excluded upon full text review and reasons for exclusion**

| Study title                                                                                                                                                                                | Year | Journal                                             | Author         | Reason for exclusion                            |
|--------------------------------------------------------------------------------------------------------------------------------------------------------------------------------------------|------|-----------------------------------------------------|----------------|-------------------------------------------------|
| 1. Simplification from protease inhibitors to once- or twice-daily raltegravir: the ODIS trial                                                                                             | 2010 | HIV clinical trials                                 | Vispo et al    | Single arm study. Additionally, no outcome      |
| 2. Substitution of raltegravir for ritonavir-boosted protease inhibitors in HIV-infected patients: the SPIRAL study.                                                                       | 2010 | AIDS                                                | Martinez et al | No outcome of interest                          |
| 3. Simplification from protease inhibitors to once- or twice-daily raltegravir: the ODIS trial                                                                                             | 2010 | HIV Clin Trials                                     | Vispo et al    | No outcome of interest                          |
| 4. Switch to a raltegravir-based regimen versus continuation of a lopinavir-ritonavir-based regimen in stable HIV-infected patients with suppressed viraemia (SWITCHMRK 1 and 2):          | 2010 | The Lancet                                          | Eron et al     | Outcome not studied                             |
| 5. Durability of a novel salvage therapy in R5 HIV-infected patients: Maraviroc, raltegravir, etravirine                                                                                   | 2011 | J Acquir Immune Defic Syndr                         | Nozza et al    | No outcome of interest                          |
| 6. Switching antiretroviral therapy to minimize metabolic complications                                                                                                                    | 2011 | HIV Therapy                                         | Lake et al     | Narrative systematic review                     |
| 7. Raltegravir as replacement for PI- or NNRTIbased ART in HIV-infected women with lipohypertrophy: The Women, Integrase, and Fat Accumulation Trial                                       | 2011 | Antiviral Therapy                                   | Lake et al     | No outcome of interest                          |
| 8. Long-term glucose tolerance in highly experienced HIV-infected patients receiving nucleoside analogue-sparing regimens                                                                  | 2012 | AIDS (London, England)                              | Bigoloni et al | INSTI vs INSTI                                  |
| 9. Elvitegravir/cobicistat /emtricitabine /tenofovir DF (Quad ) has noninferior efficacy and favorable safety compared to efavirenz/emtricitabine/tenofovir df in treatment naive HIV-1    | 2012 | Canadian journal of infectious diseases and medical | Sax et al      | No outcome of interest                          |
| 10. A Randomized Trial of Raltegravir Replacement for Protease Inhibitor or Non-Nucleoside Reverse Transcriptase Inhibitor in HIV-Infected Women with Lipohypertrophy                      | 2012 | Aids patients care and STDs                         | Lake et al     | No outcome of interest                          |
| 11. Changes in cardiovascular biomarkers in HIV-infected patients switching from ritonavir-boosted protease inhibitors to raltegravir                                                      | 2012 | AIDS                                                | Martinez et al | No outcome of interest                          |
| 12. Co-formulated elvitegravir, cobicistat, emtricitabine, and tenofovir disoproxil fumarate versus ritonavir-boosted atazanavir plus co-formulated emtricitabine and tenofovir disoproxil | 2012 | Lancet                                              | DeJesus et al  | Diabetes patients were not excluded at baseline |
| 13. Cardiovascular risk in human immunodeficiency virus-infected patients in Spain. CoRIS cohort                                                                                           | 2012 | Enferm Infecc Microbiol Clin                        | Masia et al    | No outcome of interest                          |
| 14. A randomised trial of Raltegravir Replacement for Protease Inhibitor or Non-Nucleoside Reverse Transcriptase Inhibitor in HIV Infected Women with Lipohypertrophy                      | 2012 | AIDS Patient Care and STDs                          | Lake et al     | Outcome not studied                             |
| 15. Once-daily dolutegravir versus twice-daily raltegravir in antiretroviral-naive adults with HIV-1 infection (SPRING-2 study): 96 week results from a randomised, double-blind, non-     | 2013 | lancet infectious diseases                          | Raffi et al    | Both treatment arms contained INSTIs            |
| 16. HIV lipodystrophy in participants randomised to lopinavir/ritonavir (LPV/r) +2-3 nucleoside/nucleotide reverse transcriptase inhibitors (N(t)RTI) or LPV/r + raltegravir as            | 2013 | PloS one                                            | Martin et al   | Protease inhibitors coupled with INSTI in       |
| 17. Effects of switching from stavudine to raltegravir on subcutaneous adipose tissue in HIV-infected patients with HIV/HAART-associated lipodystrophy syndrome (HALS). A clinical         | 2014 | PloS one                                            | Domingo et al  | Single arm study                                |
| 18. Dolutegravir: clinical and laboratory safety in integrase inhibitor-naive patients                                                                                                     | 2014 | HIV Clin Trials                                     | Curtis et al   | Narrative review                                |

|                                                                                                                                                                                                  |      |                                                 |                |                                          |
|--------------------------------------------------------------------------------------------------------------------------------------------------------------------------------------------------|------|-------------------------------------------------|----------------|------------------------------------------|
| 19. A randomized, double-blind comparison of single-tablet regimen elvitegravir/cobicistat/emtricitabine/tenofovir DF vs ritonavir-boosted atazanavir plus                                       | 2014 | J Acquir Immune Defic Syndr                     | Clumek et al   | No outcome of interest                   |
| 20. Simplification to coformulated elvitegravir, cobicistat, emtricitabine, and tenofovir versus continuation of ritonavir-boosted protease inhibitor with emtricitabine and tenofovir in adults | 2014 | Lancet Infect Dis                               | Arribas et al  | No outcome of interest                   |
| 21. A randomized, double-blind comparison of single-tablet regimen elvitegravir/cobicistat/emtricitabine/tenofovir DF versus single-tablet regimen                                               | 2014 | J Acquir Immune Defic Syndr                     | Wohl et al     | No outcome of interest                   |
| 22. The impact of switching from protease-inhibitor to integrase-inhibitor therapy on biomarkers of metabolic and age-associated diseases: A longitudinal matched-cohort study                   | 2014 | Antiviral Therapy                               | Malagoli et al | No outcome of interest                   |
| 23. Telmisartan to reduce cardiovascular risk in older HIV-infected adults: a pilot study                                                                                                        | 2015 | HIV clinical trials                             | Lake et al     | No outcome of interest                   |
| 24. A prospective, randomized clinical trial of antiretroviral therapies on carotid wall thickness                                                                                               | 2015 | AIDS                                            | Stein et al    | No outcome of interest                   |
| 25. Comparative changes of lipid levels in treatment-naïve, HIV-1-infected adults treated with dolutegravir vs. efavirenz, raltegravir, and ritonavir-boosted darunavir-based regimens over      | 2015 | Clinical drug investigation                     | Quercia et al  | No outcome of interest                   |
| 26. Comparison of the metabolic effects of ritonavir-boosted darunavir or atazanavir versus raltegravir, and the impact of ritonavir plasma exposure: ACTG 5257                                  | 2015 | Clinical infectious diseases                    | Ofotokun et al | No outcome of interest                   |
| 27. Post-prandial lipid effects of raltegravir versus darunavir/ritonavir in HIV-1-infected adults commencing combination ART                                                                    | 2015 | J Antimicrob Chemother                          | Lee et al      | No outcome of interest                   |
| 28. Effects of raltegravir combined with tenofovir/emtricitabine on body shape, bone density, and lipids in African-Americans initiating HIV therapy                                             | 2015 | HIV clinical trials                             | Young et al    | Single arm study                         |
| 29. Human immunodeficiency virus (HIV) modulates the associations between insulin resistance and cognition in the current combination antiretroviral therapy (cART) era: a                       | 2015 | Journal of neurovirology                        | Valcour et al  | No outcome of interest                   |
| 30. Rosuvastatin vs. protease inhibitor switching for hypercholesterolaemia: a randomized trial                                                                                                  | 2016 | HIV medicine                                    | Lee et al      | No outcome of interest                   |
| 31. Efficacy of dolutegravir/abacavir/lamivudine (DTG/ABC/3TC) fixed-dose combination (FDC) compared with ritonavir-boosted atazanavir (ATV/R) plus tenofovir disoproxil                         | 2016 | Open Forum Infect Dis                           | Hagins         | No outcome of interest                   |
| 32. Integrase inhibitor versus protease inhibitor-based regimen for HIV-1 infected women (WAVES): a randomised, controlled, double-blind, phase 3 study.                                         | 2016 | Lancet HIV                                      | Squires et al  | No outcome of interest                   |
| 33. Efficacy and Safety of Elvitegravir/Cobicistat/Emtricitabine/ Tenofovir Disoproxil Fumarate in Asian Subjects with Human Immunodeficiency Virus 1 Infection: A SubAnalysis of Phase 3        | 2016 | Infect Chemother                                | Choi et al     | Sub-analysis of already included studies |
| 34. Switching to Tenofovir Alafenamide, Coformulated With Elvitegravir, Cobicistat, and Emtricitabine, in HIV-Infected Patients With Renal Impairment: 48-Week Results From a                    | 2016 | Journal of acquired immune deficiency syndromes | Pozniak et al  | Single arm study                         |
| 35. Neither boosted elvitegravir nor darunavir with emtricitabine/tenofovir disoproxil fumarate increase insulin resistance in healthy volunteers: results from the STRIBILD-IR study            | 2016 | Antiviral therapy                               | Spinner et al  | HIV negative study participants          |
| 36. Switch to dolutegravir in HIV patients responding to a firstline antiretroviral treatment: 48 weeks results                                                                                  | 2016 | J Int AIDS Soc                                  | Tau et al      | No outcome of interest                   |
| 37. Changes in liver steatosis after switching efavirenz to raltegravir: The steral study                                                                                                        | 2017 | Clin Infect Dis                                 | Macias et al   | No outcome of interest                   |
| 38. Weight Gain in Persons with HIV Switched from Efavirenz-Based to Integrase Strand Transfer Inhibitor-Based Regimens                                                                          | 2017 | JAIDS                                           | Norwood et al  | No outcome of interest                   |

|                                                                                                                                                                                                  |      |                                                 |                |                                                |
|--------------------------------------------------------------------------------------------------------------------------------------------------------------------------------------------------|------|-------------------------------------------------|----------------|------------------------------------------------|
| 39. Phase 3 randomized, controlled trial of switching to fixed-dose bicitgravir/emtricitabine/tenofovir alafenamide (B/F/TAF) from boosted protease inhibitor-                                   | 2017 | Open Forum Infec Dis                            | Daar et al     | No outcome of interest                         |
| 40. Switching from a ritonavir-boosted protease inhibitor to a dolutegravir-based regimen for maintenance of HIV viral suppression in patients with high cardiovascular risk.                    | 2017 | AIDS                                            | Gatell et al   | Comparator groups had diabetic patients at     |
| 41. Switching to the single-tablet regimen of elvitegravir, cobicistat, emtricitabine, and tenofovir DF from non-nucleoside reverse transcriptase inhibitor plus co-formulated emtricitabine and | 2017 | HIV Clin Trials                                 | Pozniac et al  | No outcome of interest                         |
| 42. Fixed-dose combination dolutegravir, abacavir, and lamivudine versus ritonavir-boosted atazanavir plus tenofovir disoproxil fumarate and emtricitabine in previously untreated               | 2017 | Lancet HIV                                      | Orrell et al   | No outcome of interest                         |
| 43. Impact on lipid abnormalities of switching from a ritonavir-boosted protease inhibitor to a raltegravir-based cART regimen                                                                   | 2017 | AIDS                                            | Gatell et al   | No outcome of interest                         |
| 44. Body composition and metabolic outcomes after 96 weeks of treatment with ritonavir-boosted lopinavir plus either nucleoside or nucleotide reverse transcriptase inhibitors or                | 2017 | Lancet HIV                                      | Boyd et al     | Both comparator groups had patients on INSTIs. |
| 45. Adiponectin and the steatosis marker Chi3L1 decrease following switch to raltegravir compared to continued PI/NNRTI-based antiretroviral therapy                                             | 2018 | PloS one                                        | Offor et al    | No outcome of interest                         |
| 46. Changes in Waist Circumference in HIV-Infected Individuals Initiating a Raltegravir or Protease Inhibitor Regimen: Effects of Sex and Race                                                   | 2018 | Open forum infectious diseases                  | Bhagwat et al  | No outcome of interest                         |
| 47. Effects of antiretroviral combination therapies F/TAF, E/C/F/TAF and R/F/TAF on insulin resistance in healthy volunteers: the TAF-IR Study                                                   | 2018 | Antiviral therapy                               | Spinner et al  | Non-HIV population                             |
| 48. Gestational diabetes in women on dolutegravir- or efavirenz-based ART in Botswana                                                                                                            | 2018 | Topics in Antiviral Medicine                    | Mmasa et al    | Pregnant population                            |
| 49. Durability and tolerability of first-line combination including two NRTI and RAL or ATV/r or DRV/r in patients enrolled in the ICONA Foundation cohort. HIV Drug Therapy, Glasgow            | 2018 | HIV Clinical Trials                             | Monforte et al | No outcome of interest                         |
| 50. Evaluation of the efficacy and safety of integrase inhibitor in the treatment of acute HIV infection.                                                                                        | 2018 | ChiCtr                                          | Kang et al     | Protocol publication. No results posted yet    |
| 51. Dolutegravir + lamivudine dual therapy in patients with suppressed HIV-RNA: Long term virological and immunological results of a multicentre cohort                                          | 2018 | Journal of the International AIDS Society       | Maggiolo et al | Single arm, no comparator group                |
| 52. Lower pretreatment gut integrity associated with fat gains on antiretrovirals                                                                                                                | 2018 | Topics in Antiviral Medicine                    | Kamari et al   | No outcome of interest                         |
| 53. Obesity following ART initiation is common and influenced by both traditional and HIV-/ART-specific risk factors                                                                             | 2018 | The Journal of antimicrobial chemotherapy       | Bakal et al    | No outcome of interest                         |
| 54. Diagnostic Accuracy of Noninvasive Markers of Steatosis, NASH, and Liver Fibrosis in HIV-Monoinfected Individuals at Risk of Nonalcoholic Fatty Liver Disease (NAFLD): Results from          | 2019 | Journal of acquired immune deficiency syndromes | Lemoine et al  | No outcome of interest                         |
| 55. Evaluation of Safety and Effectiveness of Elvitegravir/Cobicistat/Emtricitabine/Tenofovir Alafenamide Switch Followed by Ledipasvir/Sofosbuvir HCV Therapy in HIV-HCV                        | 2019 | Open forum infectious diseases                  | Doyle et al    | No outcome of interest                         |
| 56. Improvement in liver steatosis after the switch from a ritonavir-boosted protease inhibitor to raltegravir in HIV-infected patients with non-alcoholic fatty liver disease                   | 2019 | Infectious diseases (London, England)           | Calza et al    | No outcome of interest                         |
| 57. Metabolic, mitochondrial, renal and hepatic safety of enfuvirtide and raltegravir antiretroviral administration: Randomized crossover clinical trial in healthy volunteers                   | 2019 | PloS one                                        | Barosso et al  | HIV negative population                        |
| 58. Reduced soluble CD14 levels after switching from a dual regimen with lamivudine plus boosted protease inhibitors to lamivudine plus dolutegravir in virologically suppressed HIV-            | 2019 | HIV Res Clin Pract                              | Lombardi et al | No outcome of interest                         |

|                                                                                                                                                                                                                         |      |                                                   |                 |                                                             |
|-------------------------------------------------------------------------------------------------------------------------------------------------------------------------------------------------------------------------|------|---------------------------------------------------|-----------------|-------------------------------------------------------------|
| 59. Body composition and adipokines changes after initial treatment with darunavir-ritonavir plus either raltegravir or tenofovir disoproxil fumarate-emtricitabine: A substudy of the NEAT001/ANRS143 randomised trial | 2019 | PloS one                                          | Bernadino et al | One arm had a combination of a protease inhibitor and INSTI |
| 60. Changes in Lipid Indices in HIV+ Cases on HAART                                                                                                                                                                     | 2019 | BioMed research international                     | Ji et al        | No outcome of interest                                      |
| 61. Improvement in insulin sensitivity and serum leptin concentration after the switch from a ritonavir-boosted PI to raltegravir or dolutegravir in non-diabetic HIV-infected patients                                 | 2019 | The Journal of antimicrobial chemotherapy         | Calza et al     | Both study arms had INSTIs                                  |
| 62. Incidence of select chronic comorbidities among a population-based cohort of HIV-positive individuals receiving highly active antiretroviral therapy                                                                | 2019 | Current medical research and opinion              | Gali et al      | No outcome of interest                                      |
| 63. Lipid profile improvement in virologically suppressed HIV-1-infected patients switched to dolutegravir/abacavir/lamivudine: data from the SCOLTA project                                                            | 2019 | Infection and drug resistance                     | Bagella et al   | No outcome of interest                                      |
| 64. Short-term increase in Body Mass Index and systolic blood pressure elevation in treatment naïve persons starting INSTI based antiretroviral therapy                                                                 | 2019 | HIV Medicine                                      | Galdamez et al  | Single arm study (no comparator group)                      |
| 65. Dolutegravir versus ritonavir-boosted lopinavir both with dual nucleoside reverse transcriptase inhibitor therapy in adults with HIV-1 infection in whom first-line therapy has                                     | 2019 | Lancet Infectious Diseases                        | Aboud et al     | Diabetic patients were not excluded at baseline             |
| 66. Efficacy and safety of switching to coformulated elvitegravir, cobicistat, emtricitabine, and tenofovir alafenamide (E/C/F/TAF) in virologically suppressed women                                                   | 2019 | <u>J Acquir Immune Defic Syndr.</u>               | Hodder et al    | No outcome of interest                                      |
| 67. Effects of integrase strand-transfer inhibitor use on lipids, glycemic control, and insulin resistance in the women's interagency HIV study (WIHS)                                                                  | 2019 | Open Forum Infect Dis                             | Aldredge et al  | No outcome of interest                                      |
| 68. Exploring the Prevalence and Characteristics of Weight Gain and other Metabolic Changes in Patients with HIV Infection Switching to Integrase Inhibitor Containing ART                                              | 2019 | Open Forum Infect Dis.                            | Zimmerman et al | No outcome of interest                                      |
| 69. Switching from boosted protease inhibitors (PI/r) to dolutegravir (DTG) in virologically suppressed HIV-infected patients with high cardiovascular risk: 48-week effects on                                         | 2020 | J Antimicrob Chemother                            | Gonzalez et al  | No outcome of interest                                      |
| 70. Comorbidities, antiretroviral therapy switches, and drug side-effects among HIV-infected patients                                                                                                                   | 2020 | Klimik Dergisi                                    | Evlice et al    | No outcome of interest                                      |
| 71. Dolutegravir-associated hyperglycaemia in patients with HIV                                                                                                                                                         | 2020 | The lancet. HIV                                   | Mohammed et al  | Outcome definition was symptomatic                          |
| 72. Early scale-up of antiretroviral therapy at diagnosis for reducing economic burden of cardiometabolic disease in HIV-infected population                                                                            | 2020 | AIDS                                              | Yang et al      | No outcome of interest                                      |
| 73. Factors Associated With Weight Gain in People Treated With Dolutegravir                                                                                                                                             | 2020 | Open forum infectious diseases                    | Taramasso et al | No outcome of interest                                      |
| 74. Greater Weight Gain in Treatment-naïve Persons Starting Dolutegravir-based Antiretroviral Therapy                                                                                                                   | 2020 | Clinical infectious diseases                      | Bourgi et al    | No outcome of interest                                      |
| 75. Metabolic Changes Associated With the Use of Integrase Strand Transfer Inhibitors Among Virologically Controlled Women                                                                                              | 2020 | Journal of acquired immune deficiency syndromes   | Summers et al   | Both comparator groups had diabetic patients at baseline    |
| 76. Real-World Assessment of Weight Change in People with HIV-1 After Initiating Integrase Strand Transfer Inhibitors or Protease Inhibitors                                                                            | 2020 | Journal of health economics and outcomes research | Chen et al      | No outcome of interest                                      |
| 77. Risk Factors for Weight Gain Following Switch to Integrase Inhibitor-Based Antiretroviral Therapy                                                                                                                   | 2020 | Clinical infectious diseases                      | Lake et al      | No outcome of interest                                      |



|                                                                                                                                                                                |      |                                                 |                    |                                                  |
|--------------------------------------------------------------------------------------------------------------------------------------------------------------------------------|------|-------------------------------------------------|--------------------|--------------------------------------------------|
| 78. The association between HIV tri-therapy with the development of Type-2 Diabetes Mellitus in a rural South African District: A case-control study                           | 2020 | PLOS one                                        | Bam et al          | Case control design was among exclusion criteria |
| 79. Durable Suppression and Low Rate of Virologic Failure 3 Years After Switch to Dolutegravir + Rilpivirine 2-Drug Regimen: 148-Week Results From the SWORD-1 and SWORD-2     | 2020 | J Acquir Immune Defic Syndr                     | Jean van Wyk et al | One arm had an INSTI and NNRTI combined          |
| 80. Fat gain differs by sex and hormonal status in persons living with suppressed HIV switched to raltegravir/etravirine                                                       | 2020 | AIDS                                            | Assoumou et al     | INSTIs and NNRTIs in the same arm                |
| 81. Plasma lipidome abnormalities in people with HIV initiating antiretroviral therapy                                                                                         | 2020 | Translational Medicine Communications           | Bowman et al       | No outcome of interest                           |
| 82. Weight gain and dyslipidaemia among virally suppressed HIV-positive patients switching to co-formulated elvitegravir/cobicistat/emtricitabine/tenofovir alafenamide        | 2020 | International journal of infectious diseases    | Kuo et al          | No outcome of interest                           |
| 83. Weight Gain Associated With Integrase Strand Transfer Inhibitor Use in Women                                                                                               | 2020 | Clinical Infectious Diseases                    | Kerchberger et al  | No outcome of interest                           |
| 84. Weight gain during pregnancy in women with HIV receiving different antiretroviral regimens                                                                                 | 2020 | Antiviral therapy                               | Floridia et al     | Pregnant study participants                      |
| 85. Weight gain following antiretroviral therapy (ART) initiation in ART-naive participants in the current treatment era                                                       | 2020 | Pharmacoepidemiology and Drug Safety            | Ruderman et al     | No outcome of interest                           |
| 86. Weight gain in persons living with HIV (PLWH) treated with bicitegravir compared to other integrase strand transfer inhibitors                                             | 2020 | Open Forum Infectious Diseases                  | Fang et al         | INSTI vs INSTI study                             |
| 87. Excess burden of age-associated comorbidities among people living with HIV in British Columbia, Canada: a population-based cohort study                                    | 2021 | BMJ open                                        | Nanditha et al     | Compared HIV patients to HIV negative patients.  |
| 88. The burden of non-communicable diseases and mortality in people living with HIV (PLHIV) in the pre-, early- and late-HAART era                                             | 2021 | HIV medicine                                    | Jespersen et al    | Comparative group is a non-HIV population        |
| 89. Gestational diabetes in women living with HIV in Botswana: lower rates with dolutegravir than with efavirenz-based antiretroviral therapy                                  | 2021 | HIV medicine                                    | Mmasa et al        | Pregnant population                              |
| 90. Weight changes after antiretroviral therapy initiation in CoRIS (Spain): a prospective multicentre cohort study                                                            | 2021 | JIAS                                            | Martinez et al     | No outcome of interest                           |
| 91. Antiretroviral Therapy Initiation Is Associated With Decreased Visceral and Subcutaneous Adipose Tissue Density in People Living With Human Immunodeficiency Virus         | 2021 | Clinical infectious diseases                    | Debroy et al       | No outcome of interest                           |
| 92. Brief Report: Weight Gain Following ART Initiation in ART-Naive People Living With HIV in the Current Treatment Era                                                        | 2021 | Journal of acquired immune deficiency syndromes | Ruderman et al     | No outcome of interest                           |
| 93. Effect of menopause on weight gain, insulin and waist circumference in women with HIV who switch antiretroviral therapy to abacavir/lamivudine/dolutegravir                | 2021 | AIDS                                            | Hamzah et al       | No outcome of interest                           |
| 94. Implications of weight gain with newer antiretrovirals: 10-year predictions of cardiovascular disease and diabetes                                                         | 2021 | AIDS                                            | McCann et al       | No outcome of interest                           |
| 95. Changes in renal and metabolic indices after switching from tenofovir disoproxil fumarate- to tenofovir alafenamide-containing ART among individuals with HIV in Canada: A | 2021 | International journal of STD & AIDS             | Shokoohi et al     | No outcome of interest                           |
| 96. Antiretroviral Therapy Initiation Is Associated With Decreased Visceral and Subcutaneous Adipose Tissue Density in People Living With Human Immunodeficiency Virus         | 2021 | Clin Infect Dis                                 | Debroy et al       | No outcome of interest                           |
| 97. Insulin resistance in people living with HIV is associated with exposure to thymidine analogues and/or didanosine and prior immunodeficiency                               | 2022 | BMC Infectious Diseases                         | Høgh et al         | No outcome of interest                           |

|                                                                                                                                                                                                                     |      |                            |                  |                                 |
|---------------------------------------------------------------------------------------------------------------------------------------------------------------------------------------------------------------------|------|----------------------------|------------------|---------------------------------|
| 98. Two decade trends in cardiovascular disease risk factor and outcome burden among veterans with HIV                                                                                                              | 2022 | J. Am. Coll. Cardiol.      | Haji et al       | No outcome of interest          |
| 99. Weight changes, metabolic syndrome and all-cause mortality among Asian adults living with HIV                                                                                                                   | 2022 | HIV Med.                   | Han et al        | No outcome of interest          |
| 100. Longitudinal analysis of new-onset non-AIDS-defining diseases among people living with HIV: A real-world observational study                                                                                   | 2022 | HIV Med                    | Duan et al       | No outcome of interest          |
| 101. Metabolic complications of highly active antiretroviral therapy in adult HIV-infected patients with heart failure: A 7-year prospective cohort study                                                           | 2022 | Metab. Clin. Exp.          | Ma et al         | Conference abstract             |
| 102. Abacavir antiretroviral therapy and indices of subclinical vascular disease in persons with HIV                                                                                                                | 2022 | PLoS ONE                   | Martinez et al   | No INSTI group                  |
| 103. Adipokines, Weight Gain and Metabolic and Inflammatory Markers After Antiretroviral Therapy Initiation: AIDS Clinical Trials Group (ACTG) A5260s                                                               | 2022 | Clin. Infect. Dis.         | Koethe et al     | No outcome of interest          |
| 104. The risk of hyperglycaemia associated with the use of dolutegravir among adults living with HIV in Kampala, Uganda: a case-control study                                                                       | 2022 | Lancet Global Health       | Namara et al     | Design excluded                 |
| 105. Estimating atherosclerotic risk in south african youth with perinatally acquired HIV                                                                                                                           | 2022 | Top. Antiviral Med.        | Mahtab et al     | Could not retrieve record       |
| 106. Atrial fibrillation risk factors among patients in hiv care in the United States                                                                                                                               | 2022 | Top. Antiviral Med.        | Nance et al      | No outcome of interest          |
| 107. Trends in myocardial infarction risk by hiv status in 2 US healthcare systems                                                                                                                                  | 2022 | Top. Antiviral Med.        | Silverberg et al | Poster                          |
| 108. InSTI-related body composition differences in chronically infected MLWH                                                                                                                                        | 2022 | Top. Antiviral Med.        | Wisch et al      | Poster                          |
| 109. Metabolic Profile of People Living with HIV in a Treatment Hub in Manila, Philippines: A Pre- and Post-Antiretroviral Analysis                                                                                 | 2022 | J. ASEAN Fed. Endocr. Soc. | Francisco et al  | No INSTI arm                    |
| 110. Metabolic comorbidities and systemic arterial hypertension: the challenge faced by HIV patients on long-term use of antiretroviral therapy                                                                     | 2022 | Hosp Pract (1995)          | Mendicino et al  | Cross sectional study           |
| 111. Evaluation of cardiotoxicity and other adverse effects associated with concomitant administration of artemether/lumefantrine and atazanavir/ritonavir-based antiretroviral regimen in patients living with HIV | 2022 | Saudi Pharm. J.            | Usman et al      | No outcome of interest          |
| 112. Real-World Characterization of the Portuguese Population Living with HIV who Initiated Raltegravir Based-Regimens: The REALITY Study                                                                           | 2022 | Acta Med. Port.            | Serrão et al     | Single arm, no comparator group |
| 113. Real life use of dolutegravir doravirine dual regimen in experienced elderly PLWH with multiple comorbidities and on polypharmacy A retrospective analysis                                                     | 2021 | Medicine                   | Mazzitelli et al | Single arm                      |
| 114. Factors associated with cardiometabolic parameters at 3 years in the TANGO Study, comparing a switch to dolutegravir/ lamivudine versus maintenance of tenofovir disoproxil fumarate based regimens            | 2021 | Antiviral Ther.            | Batterhan et al  | Poster                          |
| 115. Integrase strand transfer inhibitors are associated with higher blood pressure and renin-angiotensin-aldosterone system activity                                                                               | 2021 | Antiviral Ther.            | Siddiqui et al   | No outcome of interest          |
| 116. Increase in pro-atherogenic apolipoprotein B in people living with HIV (PLWH) following switch from tenofovir disoproxil fumarate to tenofovir alafenamide                                                     | 2021 | Antiviral Ther.            | Savinelli et al  | No outcome of interest          |
| 117. Growth and Metabolic Changes after Antiretroviral Initiation in South African Children                                                                                                                         | 2021 | Pediatr. Infect. Dis. J.   | Masi-Leon et al  | No INSTI arm                    |

|                                                                                                                                                                             |      |                                           |                     |                                                |
|-----------------------------------------------------------------------------------------------------------------------------------------------------------------------------|------|-------------------------------------------|---------------------|------------------------------------------------|
| 118. Contemporary antiretrovirals and body-mass index: a prospective study of the RESPOND cohort consortium                                                                 | 2021 | Lancet HIV                                | Bansi-Matharu et al | No outcome of interest                         |
| 119. Tenofovir Alafenamide (TAF) is an Independent Risk Factor for Hyperlipidemia in Persons with Human Immunodeficiency Virus (HIV) on Antiretroviral Therapy (ART)        | 2021 | Open Forum Infect. Dis.                   | Patel et al         | Poster                                         |
| 120. Evaluation of the Incidence of Hypertension, Diabetes, and Hyperlipidemia in Patients on Antiretroviral Therapy                                                        | 2021 | Open Forum Infect. Dis.                   | Idrees et al        | Poster                                         |
| 121. Short- and Long-Term Metabolic Changes in Virologically Suppressed Patients Switching from TDF to TAF Containing Antiretroviral Therapy                                | 2021 | Open Forum Infect. Dis.                   | Schafer et al       | Poster                                         |
| 122. Incidence of metabolic complications among treatment-naïve                                                                                                             | 2021 | Open Forum Infect. Dis.                   | Daar et al          | All arms contain DTG                           |
| 123. A Real-world Study Assessing the Risk of Lipid Changes and Other Metabolic Effects Associated with Integrase Inhibitor-based Antiretroviral Therapy                    | 2021 | Open Forum Infect. Dis.                   | Gruss et al         | Poster                                         |
| 124. Stratifying the risk of NAFLD in patients with HIV under combination antiretroviral therapy (cART)                                                                     | 2021 | eClinicalMedicine                         | Bischoff et al      | No outcome of interest                         |
| 125. Implications of weight gain with newer anti-retrovirals: 10-year predictions of cardiovascular disease and diabetes                                                    | 2021 | AIDS                                      | McCann et al        | No outcome of interest                         |
| 126. Association of HIV-1 Infection and Antiretroviral Therapy With Type 2 Diabetes in the Hispanic Population of the Rio Grande Valley, Texas, USA                         | 2021 | Front. Med.                               | Lopez et al         | Cross sectional study                          |
| 127. Weight and metabolic changes after switching from tenofovir disoproxil fumarate to tenofovir alafenamide in people living with HIV: A Cohort Study                     | 2021 | Ann. Intern. Med.                         | Surial et al        | No INSTI arm                                   |
| 128. Changes in Homeostatic Model Assessment for Insulin Resistance (HOMA-IR) Index in Treated HIV-1 Infected People on Virological Suppression Who Switched to a Different | 2021 | J. Acquired Immune Defic. Syndr.          | Muccini et al       | Cohort already reported on in another study by |
| 130. Lower Cumulative Antiretroviral Exposure in People Living with HIV and Diabetes Mellitus                                                                               | 2020 | J. Acquired Immune Defic. Syndr.          | Mann et al          | No outcome of interest                         |
| 131. A prospective, randomized clinical trial of antiretroviral therapies on carotid wall thickness                                                                         | 2015 | AIDS                                      | Stein et al         | No raw data to calculate relative risks        |
| 132. Metabolic changes in the patients on second-line highly active antiretroviral therapy (HAART): A prospective cohort study from north India.                            | 2020 | Journal of Family Medicine & Primary Care | Meena et al         | No INSTI arm                                   |
| 133. Integrase Strand Transfer Inhibitors are associated with incident diabetes mellitus in people with HIV                                                                 | 2022 | Clinical Infectious Diseases              | O'Halloran et al    | INSTIS arm contains PI and NNRTI               |

**Table S7: Meta-regression\* analysis of study and HIV-related variables on the pooled effect estimate**

| Variable                       | Number of studies included | Estimate | LCI   | UCI   | I <sup>2</sup><br>Residual heterogeneity (%) | R <sup>2</sup><br>Amount of heterogeneity accounted for (%) |
|--------------------------------|----------------------------|----------|-------|-------|----------------------------------------------|-------------------------------------------------------------|
| Publication year               | 13                         | 0.02     | -0.08 | 0.13  | 51.2                                         | 0                                                           |
| Proportion of black population | 11                         | 0.002    | -0.01 | 0.01  | 28.4                                         | 0                                                           |
| Male proportion                | 12                         | -0.002   | -0.02 | 0.01  | 24                                           | 0                                                           |
| Follow-up duration (per year)  | 13                         | -0.11    | -0.18 | -0.04 | 0%                                           | 100%                                                        |

\*Only when  $\geq 10$  studies are included. LCI=lower confidence interval. UCI=upper confidence interval. Only follow-up duration is significantly associated with the pooled effect estimate in 13 studies, every additional year carries an 11% decrease in the pooled risk.

**Sub-analysis forest plots for the association of integrase inhibitor use with incident diabetes mellitus with or without metabolic syndrome.** In all Forest plots, the black polygon represents the summary measure of the random effects meta-analysis for each subgroup analysis. RR= relative risk, INSTIs= integrase strand transfer inhibitors, PIs=protease inhibitors, NNRTIs=non nucleotide reverse transcriptase inhibitors.

**Figure S1: Sub-analysis by non-INSTIs regimen in the control group (protease inhibitors and non-nucleotide reverse transcriptase inhibitors)**

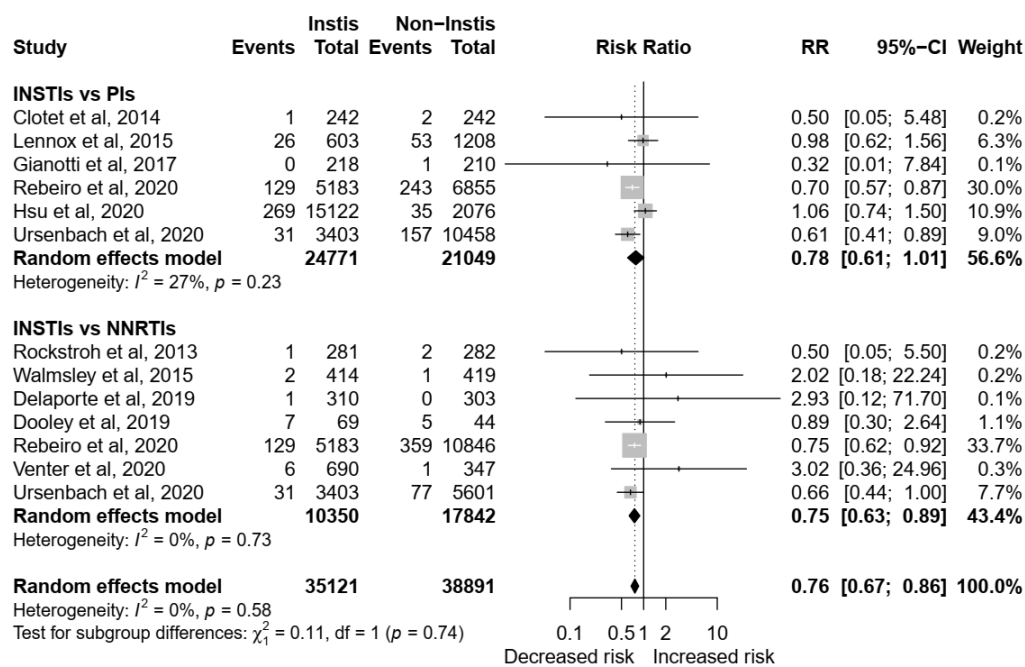

Figure S2: Sub-analysis by follow-up duration

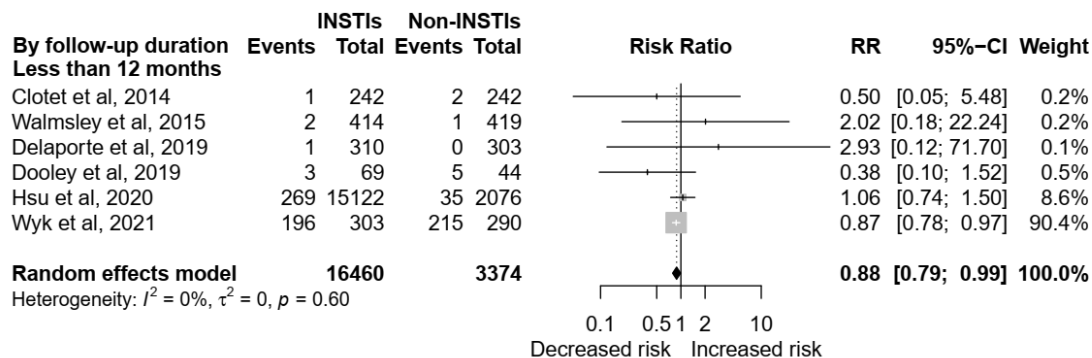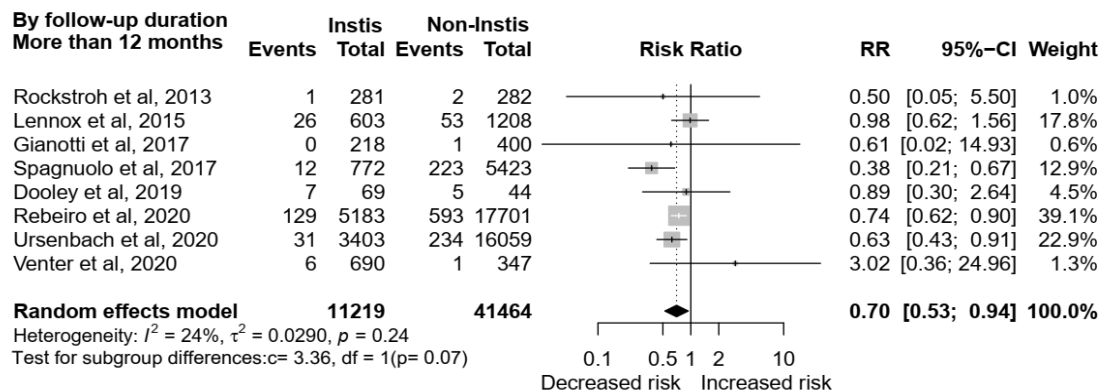

Figure S3: Sub-analysis geographical origin of the study population

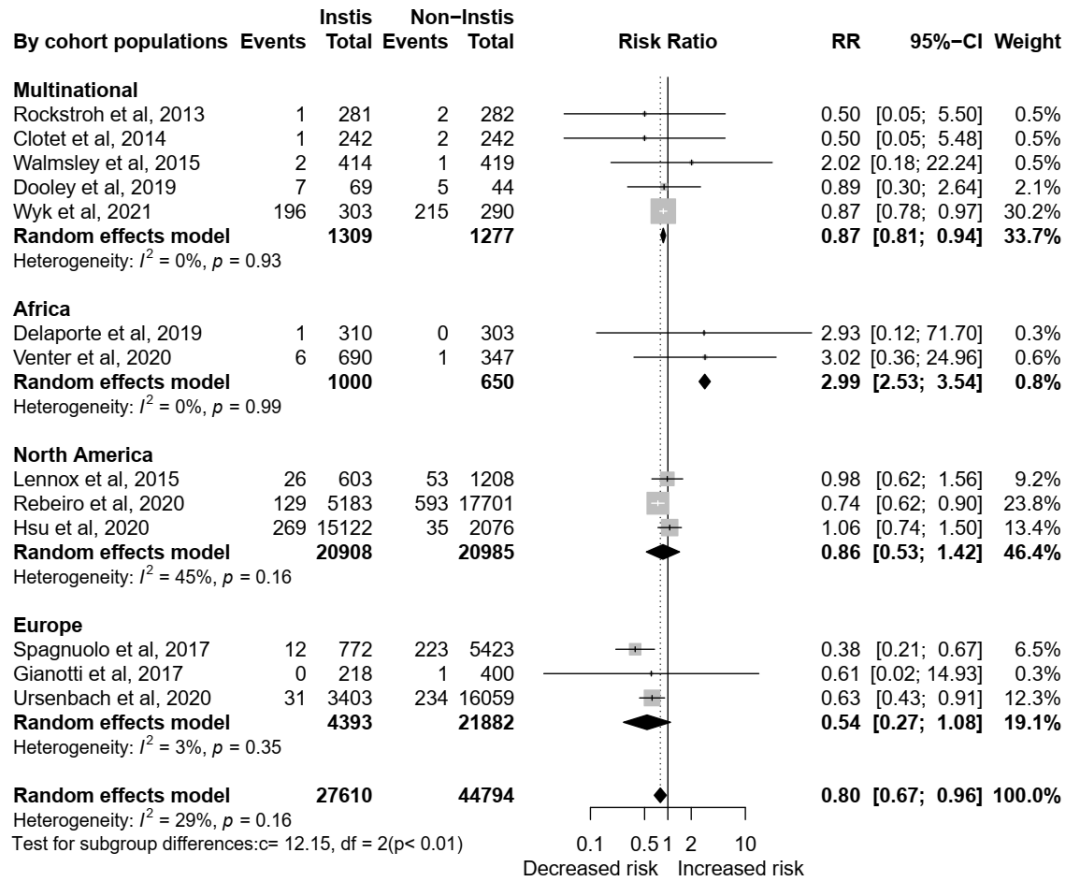

Figure S4: Sub-analysis by ART status at baseline

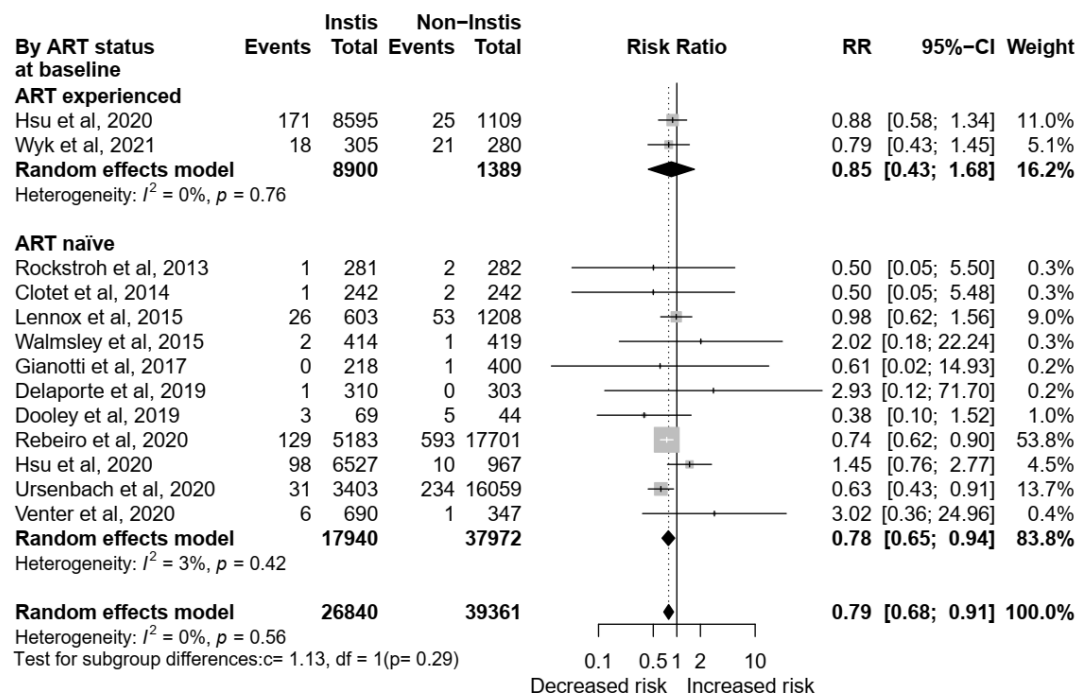



Figure S5: Sub-analysis by study design

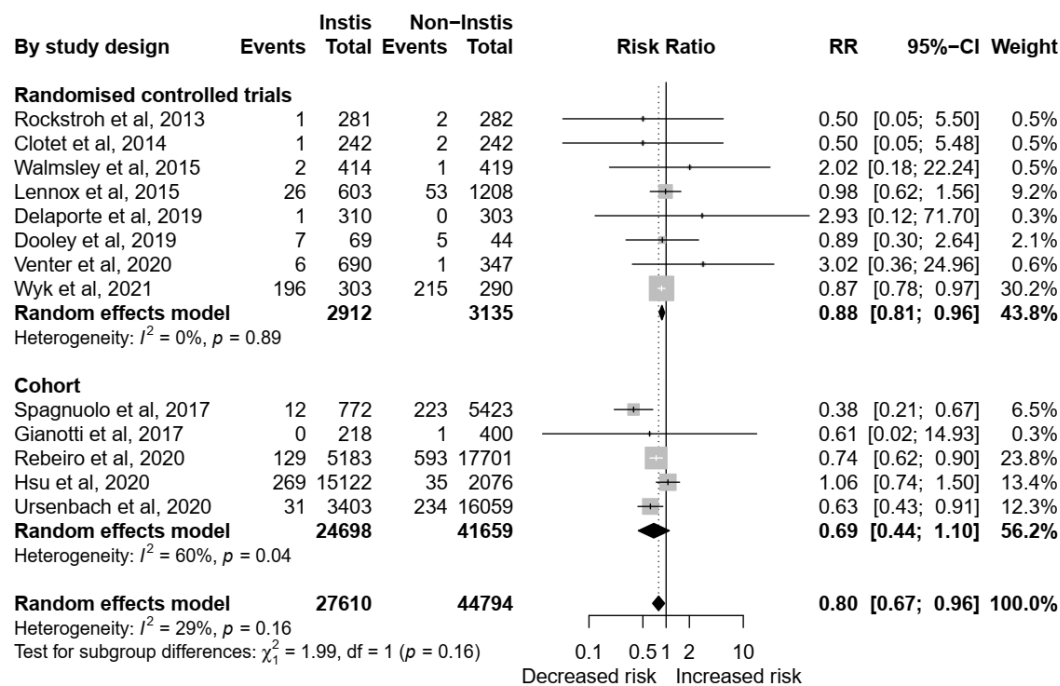

**Figure S6.** Assessment of publication bias by funnel plot asymmetry test for 13 studies meta-analysed for incident insulin resistance and/or diabetes in INSTIs compared to non-INSTIs.

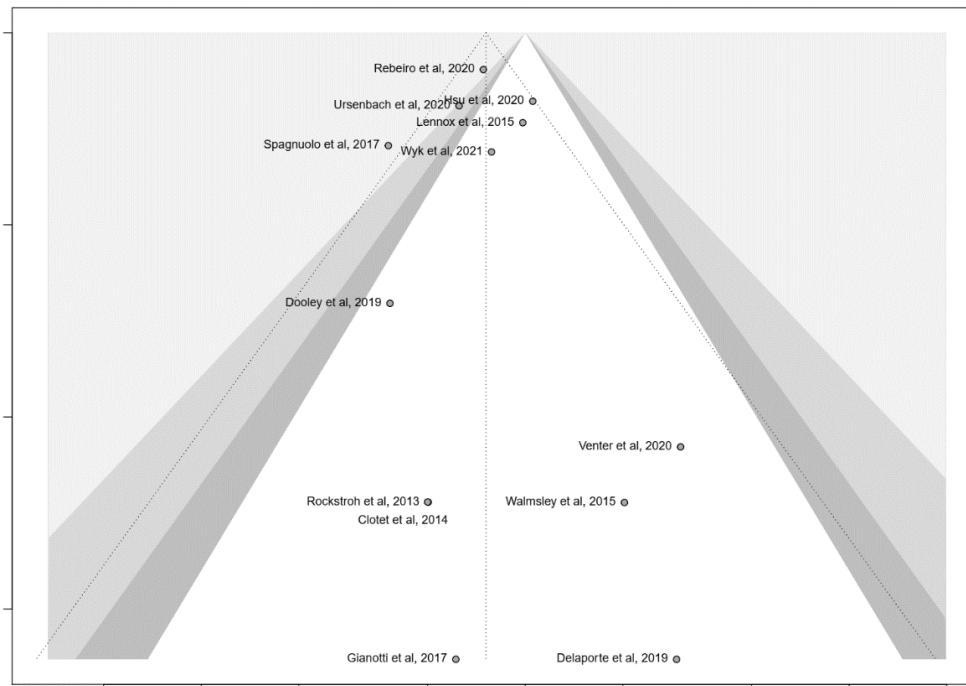

Egger's test for the intercept:

Intercept = 0.093 (95% CI -0.84 – 1.03, P=0.85)

There is no funnel plot asymmetry by Egger's test.

**Figure S7.** Mean changes in HOMA-IR from baseline in INSTIs group compared to overall non-INSTIs, NNRTIs and PIs groups.

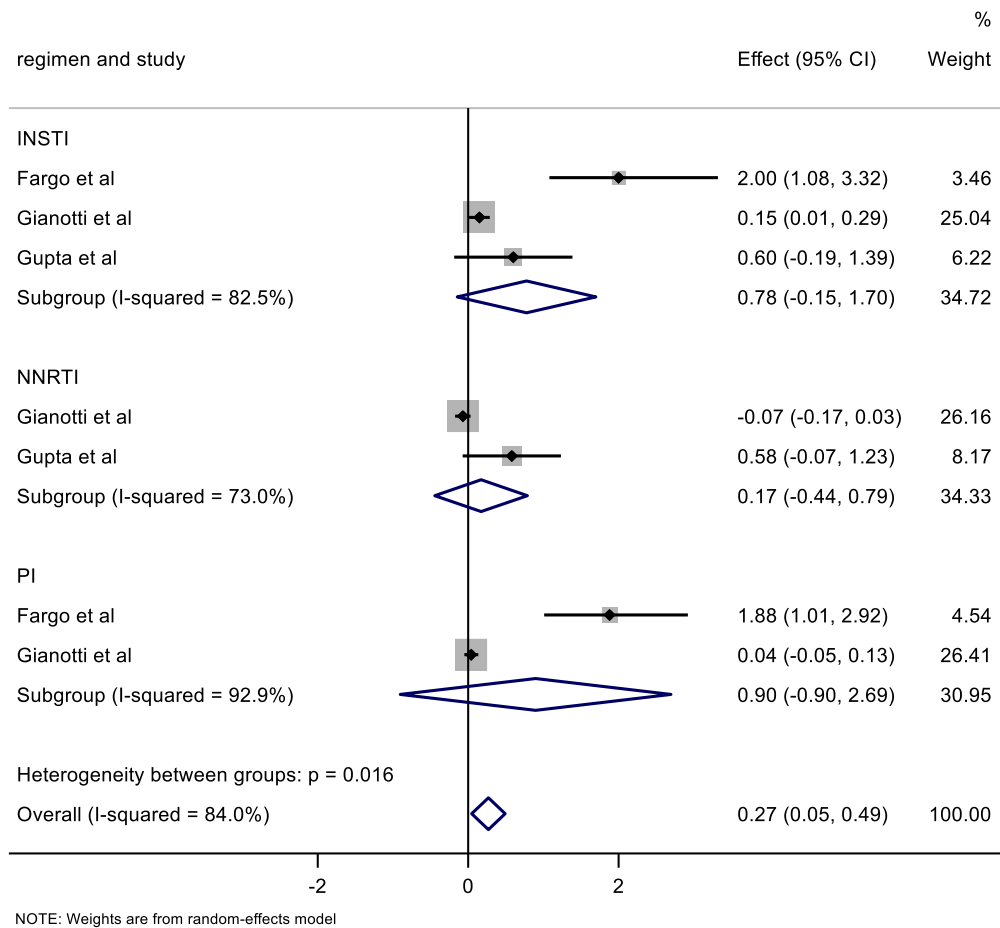

Abbreviations: HOMA IR- Homeostatic model for insulin resistance index. INSTIs=integrase strand transfer inhibitors. NNRTI=non-nucleoside reverse transcriptase inhibitors, PI=protease inhibitors.

**Figure S8:** Bubble plots for **univariable** meta-regression on (A) Baseline viral load (B) Age (C) Baseline CD4 cell count

A)

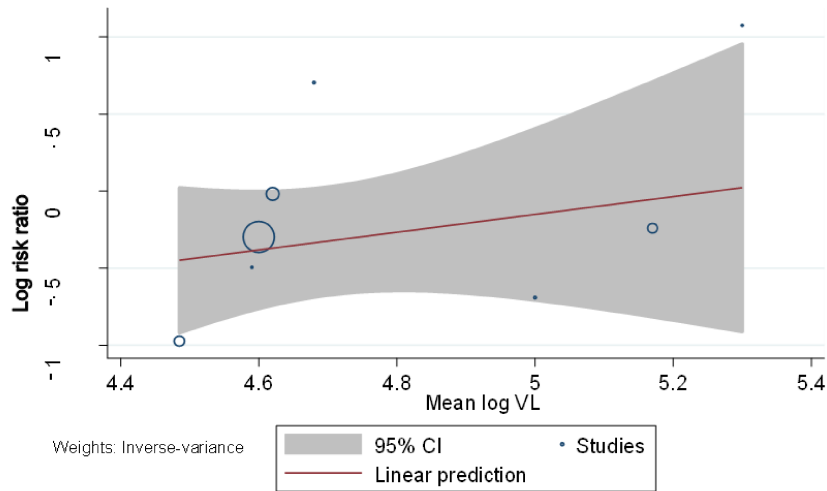

VL- viral load

P= 0.434

B)

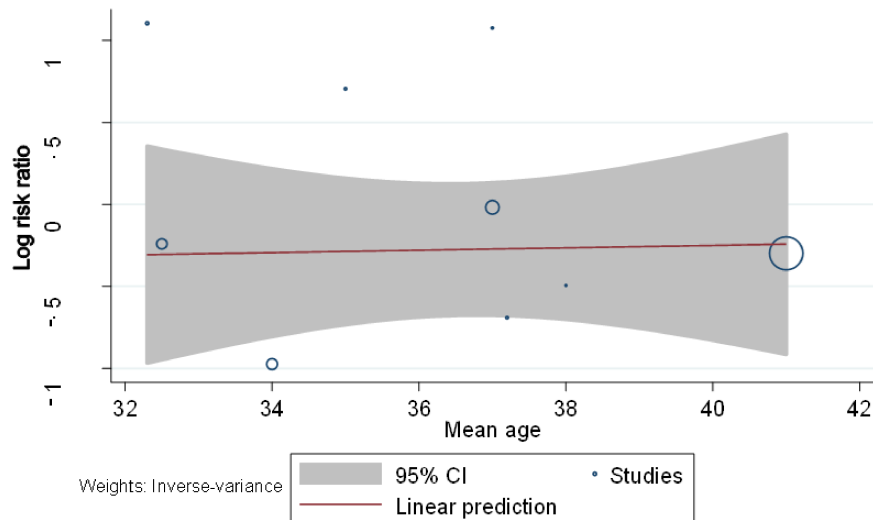

P=

Age  
0.907

C)

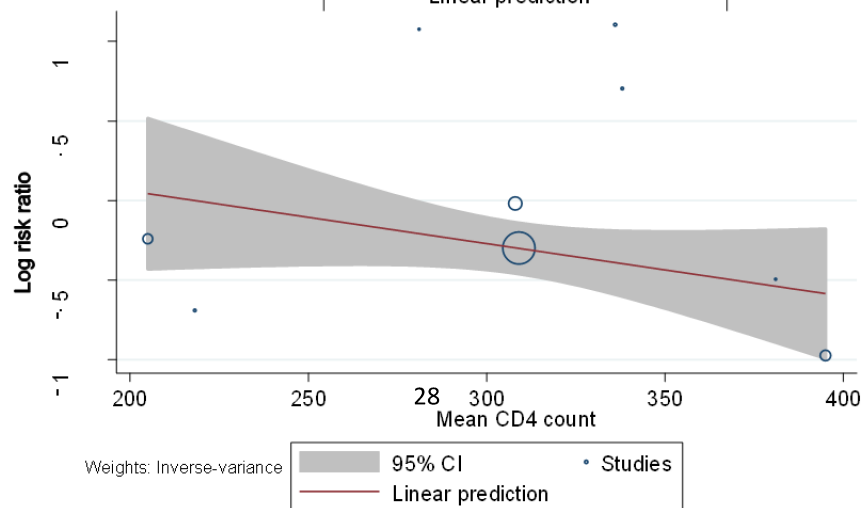

Baseline CD4 count

**P= 0.133**

Visual trends suggest a heightened risk of diabetes with exposure to INSTIs in patients with a high baseline viral load (A) and low CD4<sup>+</sup> cell count (C). However, this heightened risk was not statistically significant. There was no trend suggestive of age affecting the association between integrase strand transfer inhibitors and incident diabetes.

**Figure S9:** Bubble plot for univariable meta-regression on follow-up time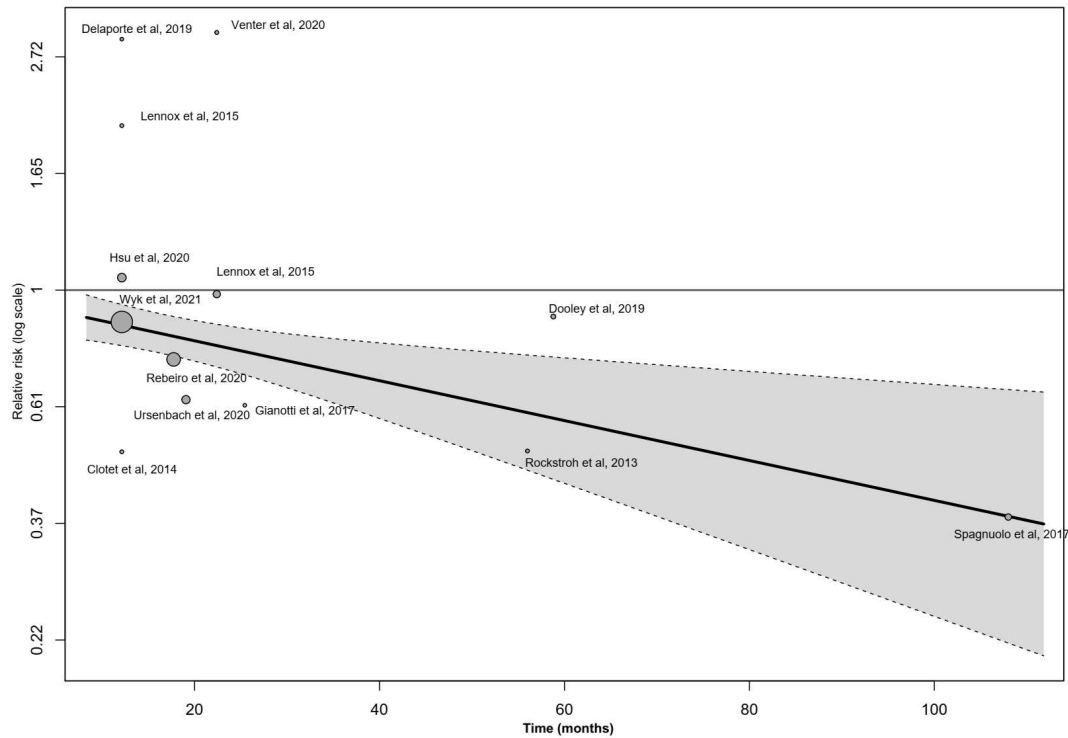

As demonstrated, the risk of developing diabetes with exposure to INSTIS decreased significantly with longer duration of follow-up.

See Figure S2 for the pooled risk by follow-up time (12 months).

**Figure S10: Influence analysis\*by leave one-out-method for 13 studies pooled in the meta-analysis sorted by effect size.**

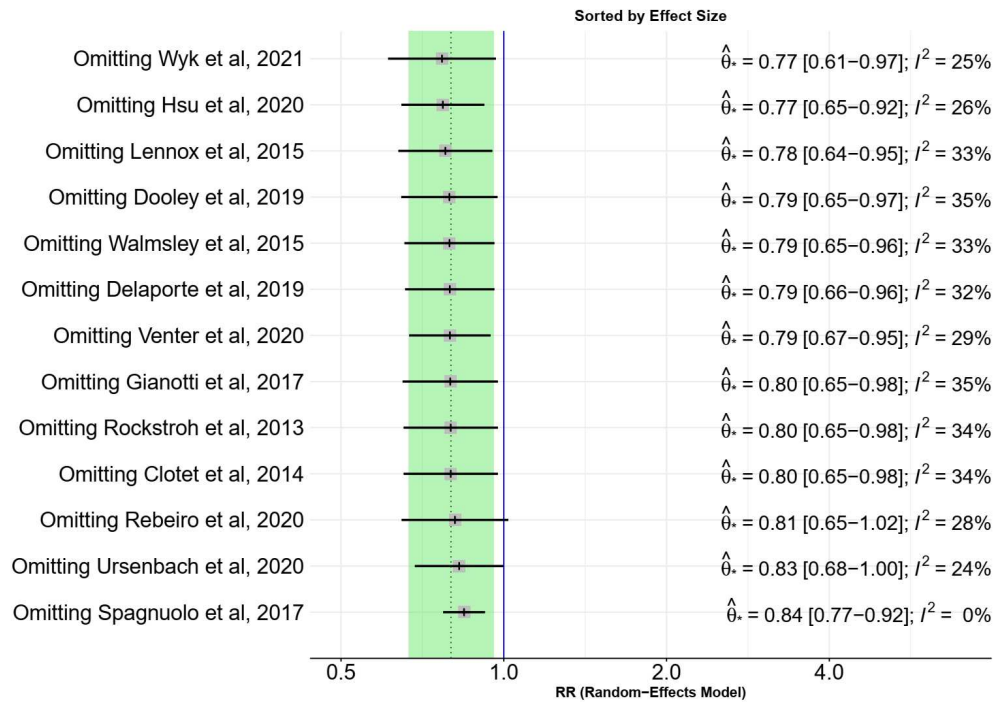

Abbreviations:  $\theta$ =effect size;  $I^2$ =heterogeneity; RR=relative risk. In Influence analysis the pooled effect estimate is calculated while omitting one study at a time to detect the individual impact of each study. For e.g., omitting Spagnuolo et al.2017 will yield a pooled relative risk of the remaining 12 studies= 0.84 with 95% CI (0.77-0.92) with minimal heterogeneity  $I^2=0\%$ .

**Figure S11: Baujat plot\* showing each study contribution to the overall heterogeneity of the meta-analysis (studies n=13)**

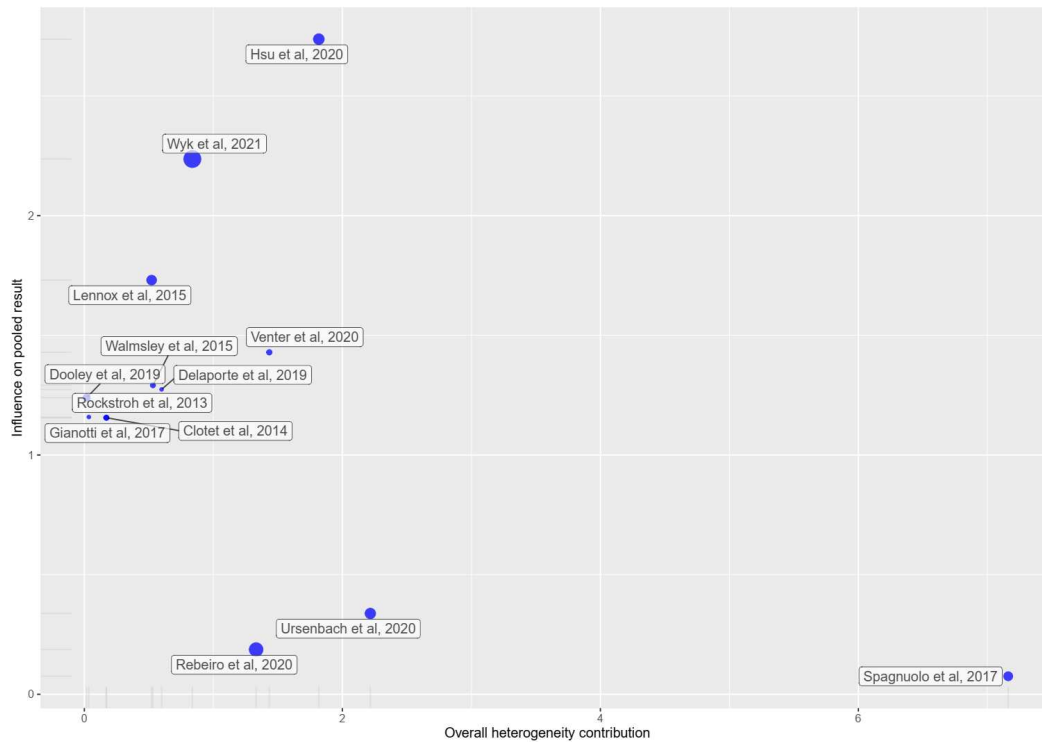

The contribution of each study to the overall heterogeneity is plotted on the X axis, and each study influence on the pooled effect estimate is plotted on the Y axis. Study by Spagnuolo et al. added the most to heterogeneity but with minimal impact on the effect size due to its small sample size.

\*Baujat B, Mahe C, Pignon JP, Hill C. A graphical method for exploring heterogeneity in meta-analyses: application to a meta-analysis of 65 trials. *Stat Med.* 2002 Sep 30;21(18):2641-52. doi:10.1002/sim.1221



**Continuation of manuscript references:**

- 61 McLaughlin M, Walsh S, Galvin S. Dolutegravir-induced hyperglycaemia in a patient living with HIV. *J Antimicrob Chemother* 2018;**73**:258–60. doi:<https://dx.doi.org/10.1093/jac/dkx365>
- 62 Eckard AR, McComsey GA. Weight gain and integrase inhibitors. *Curr Opin Infect Dis* 2020;**33**:10–9. doi:[10.1097/QCO.0000000000000616](https://doi.org/10.1097/QCO.0000000000000616)
- 63 Sax PE, Erlandson KM, Lake JE, *et al.* Weight Gain Following Initiation of Antiretroviral Therapy: Risk Factors in Randomized Comparative Clinical Trials. *Clinical Infectious Diseases* 2020;**71**:1379–89. doi:[10.1093/CID/CIZ999](https://doi.org/10.1093/CID/CIZ999)
- 64 Todowede OO, Mianda SZ, Sartorius B. Prevalence of metabolic syndrome among HIV-positive and HIV-negative populations in sub-Saharan Africa - A systematic review and meta-analysis 11 Medical and Health Sciences 1117 Public Health and Health Services. *Syst Rev* 2019;**8**:1–17. doi:[10.1186/S13643-018-0927-Y/TABLES/6](https://doi.org/10.1186/S13643-018-0927-Y/TABLES/6)
- 65 Ghislain M, Bastard JP, Meyer L, *et al.* Late Antiretroviral Therapy (ART) Initiation Is Associated with Long-Term Persistence of Systemic Inflammation and Metabolic Abnormalities. *PLoS One* 2015;**10**:144317. doi:[10.1371/JOURNAL.PONE.0144317](https://doi.org/10.1371/JOURNAL.PONE.0144317)
- 66 Sax PE, Erlandson KM, Lake JE, *et al.* Weight Gain Following Initiation of Antiretroviral Therapy: Risk Factors in Randomized Comparative Clinical Trials. *Clin Infect Dis* 2020;**71**:1379. doi:[10.1093/CID/CIZ999](https://doi.org/10.1093/CID/CIZ999)
- 67 Birabaharan M, Strunk A, Kaelber DC, *et al.* Sex differences in type 2 diabetes mellitus prevalence among persons with HIV. *AIDS* 2022;**36**:383–9. doi:[10.1097/QAD.0000000000003127](https://doi.org/10.1097/QAD.0000000000003127)
- 68 Prioreshi A, Munthali RJ, Soepnel L, *et al.* Incidence and prevalence of type 2 diabetes mellitus with HIV infection in Africa: a systematic review and meta-analysis. *BMJ Open* 2017;**7**:e013953. doi:[10.1136/BMJOPEN-2016-013953](https://doi.org/10.1136/BMJOPEN-2016-013953)
- 69 Spinelli MA, Hessol NA, Schwarcz SK, *et al.* Disparities in Integrase Inhibitor Usage in the Modern HIV Treatment Era: A Population-Based Study in a US City. *Open Forum Infect Dis* 2021;**8**. doi:[10.1093/OFID/OFAB139](https://doi.org/10.1093/OFID/OFAB139)
- 70 Naito T, Mori H, Fujibayashi K, *et al.* Analysis of antiretroviral therapy switch rate and switching pattern for people living with HIV from a national database in Japan. *Scientific Reports* 2022 **12**:1 2022;**12**:1–11. doi:[10.1038/s41598-022-05816-5](https://doi.org/10.1038/s41598-022-05816-5)
- 71 Version. Division of AIDS (DAIDS) Table for Grading the Severity of Adult and Pediatric Adverse Events. 2014.
